# Supplementary material
Source: PubMed Central journal article supplement (PMC6182107)

## Introduction

Colon cancer is the 3<sup>rd</sup> most common cancer in both males and females in Canada (1,2).

Surgical excision of the affected colon – a colectomy – is the recommended treatment for most patients diagnosed with colon cancer (3). Historically, the standard approach to colectomy was through an open procedure typically via a midline laparotomy incision. The required long incision, manual manipulation of tissue and associated blood loss cause an exaggerated physiological stress response, prolonged paralysis of bowel (ileus) and increased requirement for opioid analgesia, all of which impairs postoperative recovery. In the late 1980s, surgeons began evaluating laparoscopic colectomy (LC) as an alternative to open colectomy (OC) (4), and by 2004, randomized controlled trial evidence clearly demonstrated that LC for colon cancer accelerated postoperative recovery, reduced duration of hospital stay, and reduced postoperative pain /narcotic requirements while providing equivalent oncologic outcomes (recurrence, survival) when compared to OC (5-9). The adoption of LC for colon cancer in the later part of the first decade of the twenty-first century has been demonstrated in several countries; LC rates in the US increased from 11% in 2007 to 45% in 2009 (10,11). From 2009 to 2014, LC rates increased from 30% to 61% and from 9% to 30% in the Netherlands and Sweden respectively. In South Korea, 65% of patients with colon cancer underwent LC in 2014, compared to 44% in 2008 (12).

There are few population-based data from Canada describing the uptake of LC: data from Ontario show that between 2002 and 2009, the proportion of elective colectomies done laparoscopically increased from 13% to 37% (13). In British Columbia, the proportion of colon cancer patients undergoing LC increased from 2% to 25% between 2003 and 2008 (14). To date, published population-based data from other provinces do not exist.

1  
2  
3 The objective of our study was to examine the uptake of LC in Canada, and specifically compare  
4 its use among all Canadian provinces (except Quebec) while identifying other factors associated  
5 with LC.  
6  
7  
8  
9

## 10 11 **Methods**

12  
13 This study included all patients undergoing elective colectomy for colon cancer in Canada  
14 identified through the hospital Discharge Abstract Database (DAD) maintained by the Canadian  
15 Institute for Health Information (CIHI) (15) between April 1, 2004 and March 31, 2015 (fiscal  
16 years 2004 – 2014). Patients from Quebec were not included as data from that province are not  
17 reported to CIHI. Patients with an International Classification of Diseases and Related Health  
18 Problems, 10<sup>th</sup> Revision, Canada (ICD-10-CA) (16) primary diagnosis of colon cancer (C18.0-  
19 18.9 or C19) and a Canadian Classification of Health Intervention (CCI) (17) procedure code for  
20 colectomy (1.NM.87, 89, 91 or 1.NQ.87) were identified, and those without a valid Canadian 3-  
21 digit postal code and aged  $\leq 17$  years of age were excluded. In order to best identify a cohort  
22 eligible for both OC and LC, the following exclusion criteria were applied (Appendix A; online  
23 only): 1) multivisceral resection; 2) concomitant hepatic metastasectomy; 3) pregnancy; and 4)  
24 emergency presentation (peritonitis, bowel obstruction or admission via the emergency room).  
25 OC and LC were differentiated using CCI codes (Appendix 2).  
26  
27  
28  
29  
30  
31  
32  
33  
34  
35  
36  
37  
38  
39  
40  
41  
42  
43

44 Demographic (age, sex, year of surgery, rural/urban residence, and province of residence),  
45 patient (Elixhauser comorbidity index, segment of colon resected), and system (average annual  
46 hospital and surgeon colectomy volume) characteristics were identified on the DAD record.  
47  
48  
49

50 Rural/urban residence was determined according to the forward sortation area based on the first 3  
51 digits of the 6-digit Canadian postal code. For average annual hospital and surgeon volumes, the  
52 average number of colectomies for years in which at least one colectomy was performed was  
53  
54  
55  
56  
57  
58  
59  
60

1  
2  
3 calculated for each surgeon and hospital. The average volumes were categorized into quartiles  
4  
5 and then dichotomized into high and low, defined as above and below the 75<sup>th</sup> percentile.  
6

7  
8 Therefore, a high-volume surgeon would on average perform more than 7 colectomies per year  
9  
10 and at least 37 colectomies would be performed annually in a high-volume hospital.  
11

### 12 *Analysis*

13  
14 The number and proportion of patients undergoing OC or LC were reported by province and  
15  
16 year. The association between LC and each predictor variable was assessed by simple logistic  
17  
18 regression. Variables with a P-value of less than or equal to 0.2 were included in an initial  
19  
20 multiple logistic regression model. The final multivariable model included all variables with a P  
21  
22 value of less than 0.05.  
23  
24

25  
26 To better understand the most current practice patterns, multiple logistic regression analysis of  
27  
28 provincial use of LC in the final year of the study was also performed, controlling for  
29  
30 demographic, clinical and system predictor variables.  
31  
32

33 Associations were reported as odds ratio (OR) for univariate and adjusted OR for multivariate  
34  
35 analyses with 95% confidence interval (95% CI) and P value for each OR. All analyses were  
36  
37 conducted with STATA 14<sup>®</sup> StataCorp. 2015. *Stata Statistical Software: Release 14*. College  
38  
39 Station, TX: StataCorp LP.  
40  
41  
42  
43

### 44 **Results**

45  
46 Across nine provinces, CIHI DAD data identified 105,302 records of patients who underwent  
47  
48 colectomy for colon carcinoma between fiscal years 2004 and 2014. Applying the exclusion  
49  
50 criteria yielded 63,504 records (Figure 1); 19,691 (31.1%) underwent LC and 43,813 (68.9%)  
51  
52 OC.  
53  
54  
55  
56  
57  
58  
59  
60

1  
2  
3  
4  
5 The overall use of LC and OC in Canada from 2004 to 2014 is depicted in Figure 2. Over that  
6 time period, the number of patients undergoing colectomy (LC or OC) for colon cancer increased  
7 from 5,601 in 2004 to 5,976 in 2014. The annual proportion of patients undergoing LC  
8 increased from 9.2% in 2004 to 51.5% in 2014; absolute number of patients undergoing LC were  
9 513 and 3,080 respectively. The increase in LC over time appeared linear, with an average  
10 annual percentage change of 4.2%. By 2014, the majority of Canadian colon cancer patients  
11 underwent LC.  
12  
13  
14  
15  
16  
17  
18  
19  
20  
21  
22  
23

24 Patient, system and demographic characteristics of LC and OC groups are presented in Table 1.  
25 Although statistically significant due to large cohort size, some of the differences in  
26 demographic, clinical, and system factors were modest. On univariate analysis, LC was more  
27 commonly used in urban patients, those treated at high volume hospitals and by high volume  
28 surgeons, and among patients undergoing right hemicolectomy.  
29  
30  
31  
32  
33  
34

35 There were considerable differences in the proportional use of LC between provinces over the  
36 study period, ranging from 7.6% in Newfoundland to 36.9% in Ontario (Table 1; Figure 3). The  
37 annual number of patients undergoing LC and OC and the annual proportional use of LAC for  
38 each province are presented in Appendix B (online only). Newfoundland had the lowest uptake  
39 of LC with a mean annual percent change of 0.6% per year, such that only 11.2% of  
40 Newfoundland patients were treated laparoscopically in 2014. The greatest increase in the  
41 proportional use of LC was observed in Prince Edward Island, increasing from 1.9% in 2004 to  
42 43.1% in 2014. An overall average annual percent change of 4.7% was seen in Ontario, with a  
43 particularly steep increase of 9.5% in 2005. In 2014, a full 59.4% of elective colon cancer  
44  
45  
46  
47  
48  
49  
50  
51  
52  
53  
54  
55  
56  
57  
58  
59  
60

1  
2  
3 patients in Ontario underwent LC. The highest average annual percent change (5.3%) was  
4  
5 observed in British Columbia, with 60.2% of patients undergoing LC in 2014. By 2014, the  
6  
7 majority of elective colon cancer patients in Alberta underwent LC.  
8  
9

10  
11  
12 Factors associated with use of LC are presented in Table 2. Adjusted analyses demonstrate year  
13  
14 of surgery to be the strongest predictor of LC: 2014 patients were 9.3 times more likely to  
15  
16 undergo LC than 2004 patients. Adjusted provincial differences were also substantial, with  
17  
18 Newfoundland patients 86.0% less likely to undergo LC than Ontario patients. Urban  
19  
20 residence, younger age, high surgeon and high hospital volume were significantly associated  
21  
22 with increased likelihood of LC, whereas male sex, medical comorbidities, age older than 80  
23  
24 years and left sided and multisegment resection were associated with lower likelihood of LC.  
25  
26 In order to represent the most current provincial practice patterns, we performed a sub analysis  
27  
28 limited to 2014 (Table 3). This demonstrated that, compared to the overall study period, odds of  
29  
30 LC in 2014 were significantly higher for Prince Edward Island, modestly higher for Alberta and  
31  
32 British Columbia, somewhat lower for Manitoba and Nova Scotia and unchanged for  
33  
34 Newfoundland, New Brunswick and Saskatchewan.  
35  
36  
37  
38  
39  
40

## 41 **Discussion**

42  
43 This study represents the first pan-Canadian population-based description and analysis of the use  
44  
45 of LC in Canada, and demonstrated that the proportion of LC increased in nine Canadian  
46  
47 provinces from 9.2% in 2004 to 51.5% in 2014. The study period covers the decade following  
48  
49 publication of seminal randomized trials establishing oncologic equivalence and short term  
50  
51 outcome advantages of LC (5-8). The magnitude of the increase in LC observed in Canada was  
52  
53  
54  
55  
56  
57  
58  
59  
60

1  
2  
3 comparable to that observed in the United Kingdom, the Netherlands, and the United States  
4  
5 where LC rates increased to 48% (2014), 61% (2014) and 54% (2012) respectively. (11,18,19).

6  
7 We also observed significant interprovincial variations in the annual use and uptake of LC.

8  
9  
10 Regional variation of LC has been described in other countries; between 2009 and 2010 LC rates  
11  
12 ranged from 0% to 96% among 90 hospitals in the Netherlands and from 0% to 67% across 306  
13  
14 hospital referral regions in the US (19,20).

15  
16  
17  
18  
19 In preference sensitive care, where more than one acceptable treatment modality is available for  
20  
21 a given condition, surgeon preference is an important determinant of variation (21). Surgeon  
22  
23 preference in turn is primarily guided by training and experience, as well as institutional culture  
24  
25 and beliefs. In Canada, survey data suggest that surgeons who perform LC are more likely to  
26  
27 have recently entered practice, have completed a minimally invasive surgery fellowship, and / or  
28  
29 be affiliated with a university (22). This may reflect the wider adoption of minimally invasive  
30  
31 surgery in training institutions across Canada, with subsequent increased exposure of trainees to  
32  
33 advanced laparoscopic procedures (23).

34  
35  
36  
37 Practicing surgeons face unique challenges to the adoption of new surgical techniques. These  
38  
39 include limited time to attend training courses, pressure on OR resources and availability of an  
40  
41 experienced mentor. Training models traditionally used by practicing surgeons include intensive  
42  
43 short (weekend) courses, hands-on conferences and reviewing instructional videos (24). Courses  
44  
45 that are supplemented by a mentorship program have been shown to be more effective at  
46  
47 introducing advanced laparoscopic procedures in community practice. Such programs usually  
48  
49 imply one-on-one mentoring in the OR but can also include centralized and telementoring.  
50  
51

52  
53 However, all these models are time and resource intensive for both trainee and mentor and are  
54  
55  
56  
57  
58  
59  
60

1  
2  
3 rare in Canada. A more feasible, organic mentorship may ensue when a fellowship trained  
4  
5 minimally invasive surgeon joins an established community surgery practice (25).  
6  
7  
8  
9

10 There are several limitations to our study. Several clinical variables were not available in the  
11  
12 DAD maintained by CIHI (e.g. body mass index, tumour stage, local recurrence vs. primary  
13  
14 tumour, prior abdominal operation) and thus we are unable to examine their association with LC  
15  
16 use. In addition, we were not able to distinguish between the various types of LC (e.g.  
17  
18 completely laparoscopic, laparoscopic assisted, laparoscopic converted to open); therefore, LC in  
19  
20 this study should be interpreted as a procedure that was at least initiated laparoscopically. The  
21  
22 lack of inclusion of Quebec in CIHI DAD may limit the generalizability of the study findings to  
23  
24 this province. Finally, the potential impact of health policy and /or health services organization  
25  
26 factors such as funding for LC and surgeon reimbursement models for LC were not examined in  
27  
28  
29  
30  
31 our study.  
32  
33  
34

### 35 Conclusion

36  
37 Use of LC for colon cancer has increased significantly in Canada since the initial publication of  
38  
39 seminal randomized trials. However, significant interprovincial variation in the use of LC was  
40  
41 identified, not completely explained by examined patient, system and demographic factors.  
42  
43  
44 These data should serve as a baseline for the monitoring of LC uptake in Canada, and suggest  
45  
46 potential targets for strategies aimed at increasing LC use.  
47  
48  
49  
50  
51  
52  
53  
54  
55  
56  
57  
58  
59  
60

## References

- (1) Canadian Cancer Society. Canadian Cancer Society's Advisory Committee on Cancer Statistics. Canadian Cancer Statistics 2014. Toronto, ON: Canadian Cancer Society; 2014. .
- (2) The Colon Cancer Alliance. 2017; Available at: <https://www.ccalliance.org/get-information/what-is-colon-cancer/statistics/>. Accessed April 30, 2017.
- (3) Ota DM. Colon cancer. *Cancer Treat Res* 1997;90:347-56.
- (4) Jacobs M, Verdeja JC, Goldstein HS. Minimally invasive colon resection (laparoscopic colectomy). *Surg Laparosc Endosc* 1991 Sep;1(3):144-150.
- (5) Laparoscopically assisted colectomy is as safe and effective as open colectomy in people with colon cancer Abstracted from: Nelson H, Sargent D, Wieand HS, et al; for the Clinical Outcomes of Surgical Therapy Study Group. A comparison of laparoscopically assisted and open colectomy for colon cancer. *N Engl J Med* 2004; 350: 2050-2059. *Cancer Treat Rev* 2004 Dec;30(8):707-709.
- (6) Veldkamp R, Kuhry E, Hop WC, Jeekel J, Kazemier G, Bonjer HJ, et al. Laparoscopic surgery versus open surgery for colon cancer: short-term outcomes of a randomised trial. *Lancet Oncol* 2005 Jul;6(7):477-484.
- (7) Guillou PJ, Quirke P, Thorpe H, Walker J, Jayne DG, Smith AM, et al. Short-term endpoints of conventional versus laparoscopic-assisted surgery in patients with colorectal cancer (MRC CLASICC trial): multicentre, randomised controlled trial. *Lancet* 2005 May 14-20;365(9472):1718-1726.
- (8) Lacy AM, Garcia-Valdecasas JC, Delgado S, Castells A, Taura P, Pique JM, et al. Laparoscopy-assisted colectomy versus open colectomy for treatment of non-metastatic colon cancer: a randomised trial. *Lancet* 2002 Jun 29;359(9325):2224-2229.



- 1  
2  
3 (9) Schwenk W, Haase O, Neudecker J, Muller JM. Short term benefits for laparoscopic  
4 colorectal resection. *Cochrane Database Syst Rev* 2005 Jul 20;(3)(3):CD003145.  
5  
6  
7 (10) Rea JD, Cone MM, Diggs BS, Deveney KE, Lu KC, Herzig DO. Utilization of laparoscopic  
8 colectomy in the United States before and after the clinical outcomes of surgical therapy study  
9 group trial. *Ann Surg* 2011 Aug;254(2):281-288.  
10  
11  
12 (11) Moghadamyeghaneh Z, Carmichael JC, Mills S, Pigazzi A, Nguyen NT, Stamos MJ.  
13 Variations in Laparoscopic Colectomy Utilization in the United States. *Dis Colon Rectum* 2015  
14 Oct;58(10):950-956.  
15  
16  
17 (12) Park SJ, Lee KY, Lee S. Laparoscopic Surgery for Colorectal Cancer in Korea: Nationwide  
18 Data from 2008-2013. *J Minim Invasive Surg* 2015;18(2):39-43.  
19  
20  
21 (13) Chan BP, Gomes T, Musselman RP, Auer RC, Moloo H, Mamdani M, et al. Trends in colon  
22 cancer surgery in Ontario: 2002-2009. *Colorectal Dis* 2012 Oct;14(10):e708-12.  
23  
24  
25 (14) Aslani N, Lobo-Prabhu K, Heidary B, Phang T, Raval MJ, Brown CJ. Outcomes of  
26 laparoscopic colon cancer surgery in a population-based cohort in British Columbia: are they as  
27 good as the clinical trials? *Am J Surg* 2012 Oct;204(4):411-415.  
28  
29  
30 (15) Canadian Institute for Health Information. Discharge Abstract Database Metadata (DAD).  
31 2017; Available at: <https://www.cihi.ca/en/discharge-abstract-database-metadata>. Accessed  
32 12/03, 2017.  
33  
34  
35 (16) Canadian Institute for Health Information. International Statistical Classification of Diseases  
36 and Related Health Problems, 10th Revision. 2009; Available at:  
37 [https://www.cihi.ca/en/icd\\_10\\_ca\\_vol1\\_2009\\_en.pdf](https://www.cihi.ca/en/icd_10_ca_vol1_2009_en.pdf). Accessed 12/03, 2017.  
38  
39  
40  
41  
42  
43  
44  
45  
46  
47  
48  
49  
50  
51  
52  
53  
54  
55  
56  
57  
58  
59  
60

- 1  
2  
3 (17) Canadian Institute for Health Information. Canadian Classification of Health Interventions,  
4 Volume Three. 2012; Available at: [https://www.cihi.ca/en/ccj\\_volume\\_three\\_2012\\_en.pdf](https://www.cihi.ca/en/ccj_volume_three_2012_en.pdf).  
5  
6  
7 Accessed 12/03, 2017.  
8  
9  
10 (18) National Bowel Cancer Audit Report 2015. 2015; Available at:  
11  
12 <http://content.digital.nhs.uk/catalogue/PUB19500/nati-clin-audi-bowe-canc-2015.pdf>.  
13  
14 (19) Kolfshoten NE, van Leersum NJ, Gooiker GA, Marang van de Mheen PJ, Eddes EH,  
15 Kievit J, et al. Successful and safe introduction of laparoscopic colorectal cancer surgery in  
16 Dutch hospitals. *Ann Surg* 2013 May;257(5):916-921.  
17  
18  
19 (20) Reames BN, Sheetz KH, Waits SA, Dimick JB, Regenbogen SE. Geographic variation in  
20 use of laparoscopic colectomy for colon cancer. *J Clin Oncol* 2014 Nov 10;32(32):3667-3672.  
21  
22  
23 (21) Westert GP, Groenewegen PP. Medical practice variations: changing the theoretical  
24 approach. *Scand J Public Health* 1999 Sep;27(3):173-180.  
25  
26  
27 (22) Moloo H, Hagggar F, Martel G, Grimshaw J, Coyle D, Graham ID, et al. The adoption of  
28 laparoscopic colorectal surgery: a national survey of general surgeons. *Can J Surg* 2009  
29 Dec;52(6):455-462.  
30  
31  
32 (23) Doumouras AG, Saleh F, Eskicioglu C, Amin N, Cadeddu M, Hong D. Neighborhood  
33 Variation in the Utilization of Laparoscopy for the Treatment of Colon Cancer. *Dis Colon*  
34 *Rectum* 2016 Aug;59(8):781-788.  
35  
36  
37 (24) Birch DW, Misra M, Farrokhyar F. The feasibility of introducing advanced minimally  
38 invasive surgery into surgical practice. *Can J Surg* 2007 Aug;50(4):256-260.  
39  
40  
41 (25) Dominguez EP, Barrat C, Shaffer L, Gruner R, Whisler D, Taylor P. Minimally Invasive  
42 Surgery adoption into an established surgical practice: impact of a fellowship-trained colleague.  
43  
44  
45 April 2013, Volume 27, Issue 4, pp 1267–1272. *Surg Endosc* 2013;27(4):1267-1272.  
46  
47  
48  
49  
50  
51  
52  
53  
54  
55  
56  
57  
58  
59  
60

Figure 1. Flow diagram of cohort selection

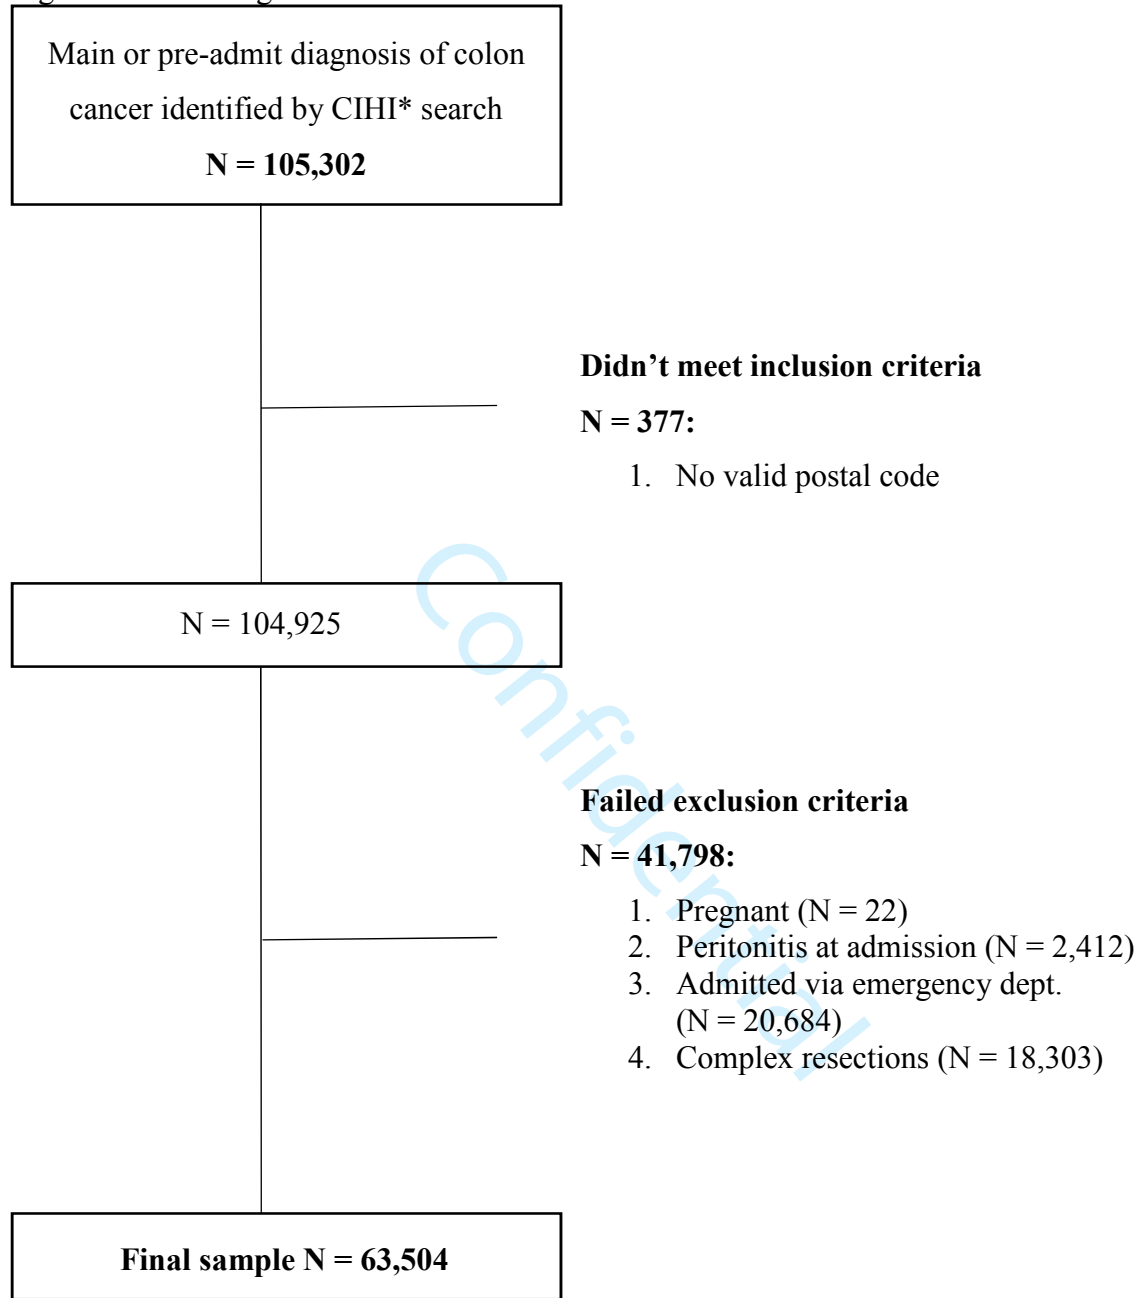

\*Canadian Institute for Health Information

Figure 2. Overall, OC and LC numbers in Canada, 2004-2014

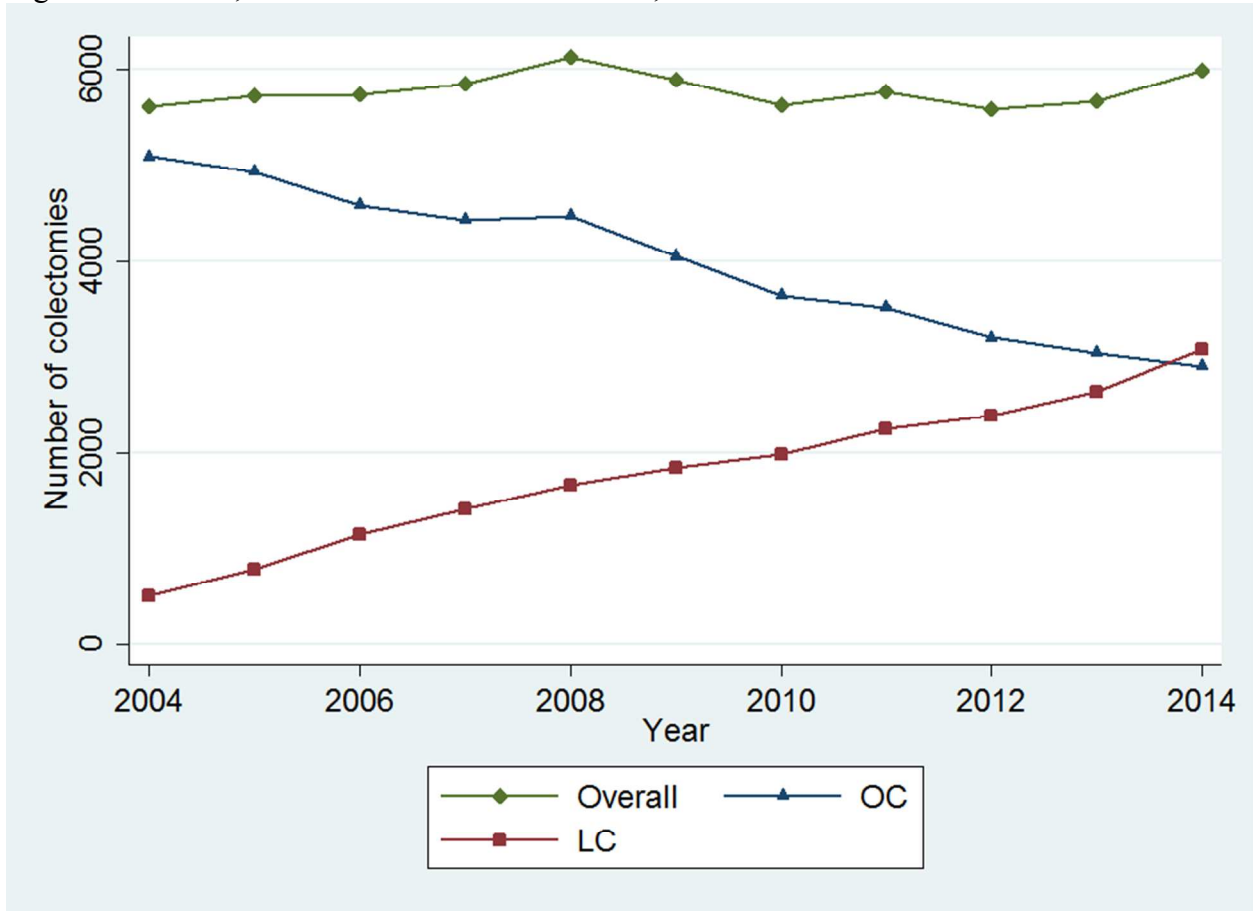

Figure 3. Proportion of LC by province

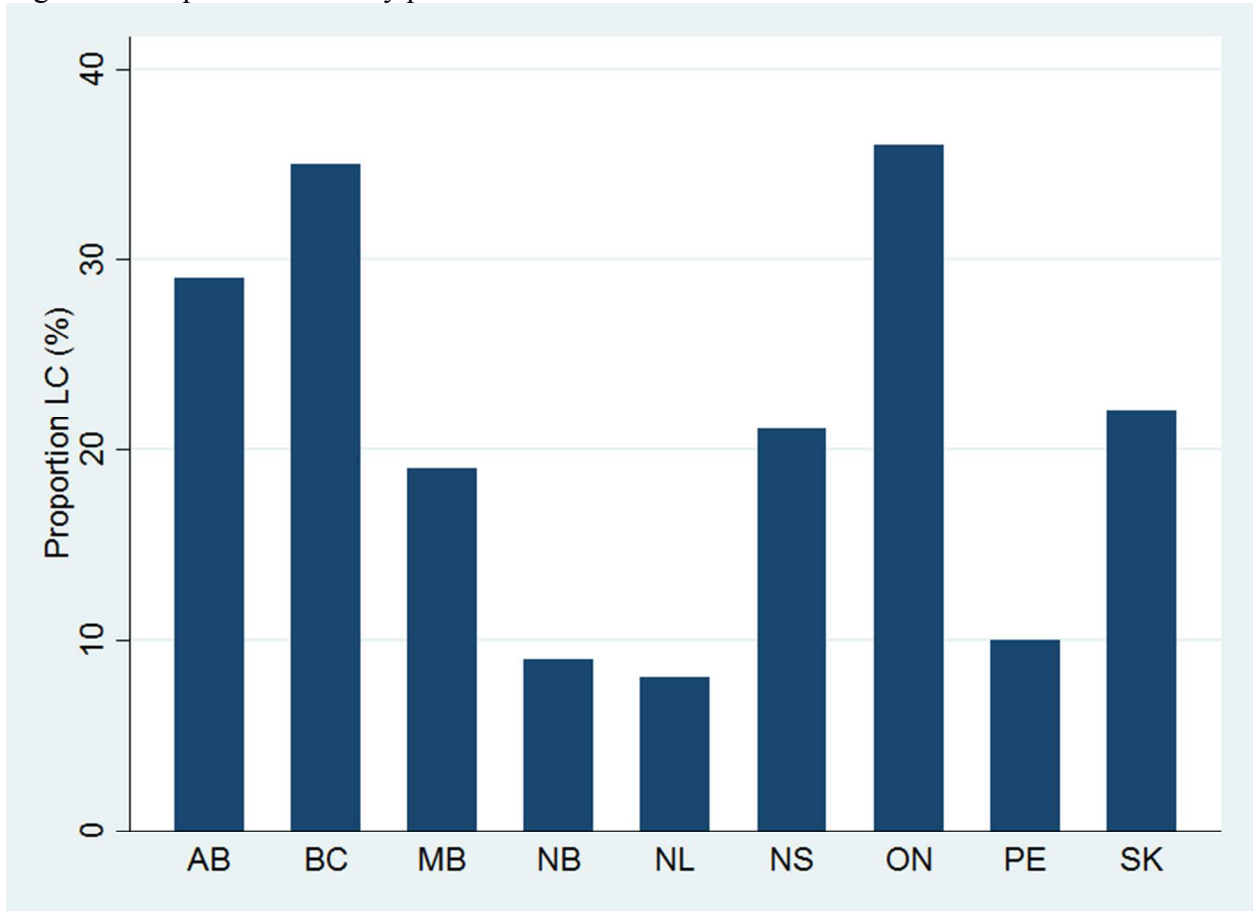

- AB Alberta
- BC British Columbia
- MB Manitoba
- NB New Brunswick
- NL Newfoundland
- NS Nova Scotia
- ON Ontario
- PE Prince Edward Island
- SK Saskatchewan

Table 1. Demographic, patient and system characteristics of patients undergoing LC and OC

| <b>Variable</b>                        | <b>Laparoscopic<br/>(N = 19,691)</b> | <b>Open<br/>(N = 43,813)</b> | <b>p-value</b> |
|----------------------------------------|--------------------------------------|------------------------------|----------------|
| Age in years: mean<br>(SD*)            | 69 (12)                              | 70 (12)                      | <0.001         |
| Gender: N (%)                          |                                      |                              | <0.001         |
| Male                                   | 10,416 (53)                          | 24,158 (55)                  |                |
| Female                                 | 9,275 (47)                           | 19,655 (45)                  |                |
| Elixhauser comorbidity<br>score: N (%) |                                      |                              | 0.04           |
| 0                                      | 12,854 (65)                          | 28,176 (64)                  |                |
| 1-3                                    | 6,714 (34)                           | 15,297 (35)                  |                |
| >3                                     | 123 (1)                              | 340 (1)                      |                |
| Residence: N (%)                       |                                      |                              | <0.001         |
| Rural                                  | 3,253 (17)                           | 10,560 (24)                  |                |
| Urban                                  | 16,438 (84)                          | 33,253 (76)                  |                |
| Surgeon volume: N (%)                  |                                      |                              | <0.001         |
| Low: 1-7                               | 5,771 (29)                           | 17,681 (40)                  |                |
| High: 7.09 – 37.27                     | 13,920 (70)                          | 26,132 (59)                  |                |
| Hospital volume: N (%)                 |                                      |                              | <0.001         |
| Low: 1-36.63                           | 5,292 (26)                           | 20,118 (45)                  |                |
| High: 37.36-102.81                     | 14,390 (73)                          | 23,713 (54)                  |                |
| Resection type: N (%)                  |                                      |                              | <0.001         |
| Right hemicolectomy                    | 10,004 (51)                          | 19,902 (45)                  |                |
| Left hemicolectomy                     | 5,809 (30)                           | 12,200 (28)                  |                |
| Anterior resection                     | 2,706 (14)                           | 8,403 (19)                   |                |
| Other                                  | 1,172 (6)                            | 3,308 (8)                    |                |
| Year of surgery: N (%)                 |                                      |                              | <0.001         |
| 2004                                   | 513 (3)                              | 5,088 (12)                   |                |
| 2005                                   | 789 (4)                              | 4,932 (11)                   |                |
| 2006                                   | 1,149 (6)                            | 4,577 (11)                   |                |
| 2007                                   | 1,410 (7)                            | 4,428 (10)                   |                |
| 2008                                   | 1,658 (8)                            | 4,467 (10)                   |                |
| 2009                                   | 1,842 (9)                            | 4,048 (9)                    |                |
| 2010                                   | 1,982 (10)                           | 3,633 (8)                    |                |
| 2011                                   | 2,250 (11)                           | 3,510 (8)                    |                |
| 2012                                   | 2,384 (12)                           | 3,199 (7)                    |                |
| 2013                                   | 2,634 (13)                           | 3,035 (7)                    |                |
| 2014                                   | 3,080 (16)                           | 2,896 (7)                    |                |

Table 1 (cont'd)

| Variable             | Laparoscopic<br>(N = 19 691) | Open<br>(N = 43,813) | p-value |
|----------------------|------------------------------|----------------------|---------|
| Province: N (%)      |                              |                      | <0.001  |
| Newfoundland         | 172 (1)                      | 2,059 (5)            |         |
| Prince Edward Island | 49 (0.3)                     | 454 (1)              |         |
| Nova Scotia          | 636 (3)                      | 2,348 (5)            |         |
| New Brunswick        | 196 (1)                      | 1,958 (5)            |         |
| Ontario              | 11,506 (58)                  | 20,088 (46)          |         |
| Manitoba             | 623 (3)                      | 2,740 (6)            |         |
| Saskatchewan         | 549 (3)                      | 1,946 (4)            |         |
| Alberta              | 1,949 (10)                   | 4,731 (11)           |         |
| British Columbia     | 4,011 (20)                   | 7,489 (17)           |         |

\*SD: Standard Deviation

Confidential

Table 2. Simple and multiple logistic regression of factors associated with LC

| Variable                    | Univariate OR* (95% CI <sup>†</sup> ) | Univariate p-value | Multivariate Adjusted OR* (95% CI <sup>†</sup> ) | Multivariate p-value |
|-----------------------------|---------------------------------------|--------------------|--------------------------------------------------|----------------------|
| Year, 2014 relative to 2004 | 7.55 (7.12-8.00)                      | <0.001             | 9.31 (8.60-10.09)                                | <0.001               |
| Female sex (reference)      | 1.00                                  |                    | 1.00                                             |                      |
| Male sex                    | 0.92 (0.88-0.95)                      | <0.001             | 0.94 (0.90-0.98)                                 | <0.001               |
| Age in years                |                                       |                    |                                                  |                      |
| 66-80 (reference)           | 1.00                                  |                    | 1.00                                             |                      |
| 18-50                       | 1.19 (1.11-1.28)                      | <0.001             | 1.15 (1.07-1.24)                                 | <0.001               |
| 51-65                       | 1.11 (1.06-1.15)                      | <0.001             | 1.14 (1.09-1.19)                                 | <0.001               |
| >80                         | 0.93 (0.89-0.98)                      | 0.01               | 0.87 (0.83-0.92)                                 | <0.001               |
| Province                    |                                       |                    |                                                  |                      |
| Ontario (reference)         | 1.00                                  |                    | 1.00                                             |                      |
| Newfoundland                | 0.12 (0.10-0.14)                      | <0.001             | 0.14 (0.12-0.16)                                 | <0.001               |
| New Brunswick               | 0.15 (0.13-0.17)                      | <0.001             | 0.16 (0.14-0.19)                                 | <0.001               |
| Prince Edward Island        | 0.14 (0.11-0.20)                      | <0.001             | 0.23 (0.17-0.32)                                 | <0.001               |
| Manitoba                    | 0.36 (0.33-0.39)                      | <0.001             | 0.39 (0.36-0.43)                                 | <0.001               |
| Saskatchewan                | 0.42 (0.38-0.46)                      | <0.001             | 0.54 (0.49-0.60)                                 | <0.001               |
| Nova Scotia                 | 0.44 (0.40-0.48)                      | <0.001             | 0.53 (0.48-0.59)                                 | <0.001               |
| Alberta                     | 0.64 (0.60-0.67)                      | <0.001             | 0.57 (0.53-0.60)                                 | <0.001               |
| British Columbia            | 0.86 (0.82-0.90)                      | <0.001             | 0.89 (0.85-0.93)                                 | <0.001               |
| Residence                   |                                       |                    |                                                  |                      |
| Rural (reference)           | 1.00                                  |                    | 1.00                                             |                      |
| Urban                       | 1.68 (1.61-1.76)                      | <0.001             | 1.24 (1.18-1.30)                                 | <0.001               |
| Elixhauser score            |                                       |                    |                                                  |                      |
| 0 (reference)               | 1.00                                  |                    | 1.00                                             |                      |
| 1-3                         | 0.88 (0.85-0.92)                      | <0.001             | 0.90 (0.87-0.94)                                 | <0.001               |
| 4-8                         | 0.76 (0.61-0.94)                      | 0.01               | 0.79 (0.63-0.98)                                 | 0.04                 |
| Hospital volume             |                                       |                    |                                                  |                      |
| Low (reference)             | 1.00                                  |                    | 1.00                                             |                      |
| High                        | 2.44 (2.35-2.54)                      | <0.001             | 2.04 (1.96-2.13)                                 | <0.001               |
| Surgeon volume              |                                       |                    |                                                  |                      |
| Low (reference)             | 1.00                                  |                    | 1.00                                             |                      |
| High                        | 1.65 (1.59-1.71)                      | <0.001             | 1.29 (1.24-1.35)                                 | <0.001               |
| Resection type              |                                       |                    |                                                  |                      |
| Right (reference)           | 1.00                                  |                    | 1.00                                             |                      |
| Left                        | 0.97 (0.93-1.01)                      | 0.20               | 0.91 (0.87-0.95)                                 | <0.001               |
| Anterior                    | 0.75 (0.70-0.81)                      | <0.001             | 0.58 (0.55-0.62)                                 | <0.001               |
| Other                       | 0.66 (0.63-0.70)                      | <0.001             | 0.71 (0.66-0.76)                                 | <0.001               |

\*OR: Odds ratio

†CI: Confidence Interval



Table 3. Logistic regression of association of provinces with LC, 2014

| Province             | Multivariate Adjusted* OR <sup>†</sup> (95% CI <sup>∞</sup> ) | Multivariate p-value |
|----------------------|---------------------------------------------------------------|----------------------|
| Ontario (reference)  | 1.00                                                          |                      |
| Newfoundland         | 0.09 (0.06-0.14)                                              | <0.001               |
| New Brunswick        | 0.18 (0.13-0.26)                                              | <0.001               |
| Prince Edward Island | 0.80 (0.48-1.34)                                              | 0.40                 |
| Manitoba             | 0.30 (0.22-0.38)                                              | <0.001               |
| Saskatchewan         | 0.51 (0.39-0.68)                                              | <0.001               |
| Nova Scotia          | 0.33 (0.25-0.44)                                              | <0.001               |
| Alberta              | 0.68 (0.57-0.81)                                              | <0.001               |
| British Columbia     | 1.10 (0.92-1.22)                                              | 0.46                 |

\*Adjusted for sex, age, rural / urban residence, Elixhauser score, hospital volume, surgeon volume and resection type

<sup>†</sup>OR: Odds Ratio

<sup>∞</sup>CI: Confidence Interval

Confidential

**Appendix A. Codes for exclusion criteria**

| Diagnostic codes (ICD-10-CA)*:                                 |                                                                                            | N      |
|----------------------------------------------------------------|--------------------------------------------------------------------------------------------|--------|
| Z32.1                                                          | Pregnancy confirmed                                                                        | 22     |
| K65.0                                                          | Peritonitis                                                                                | 2,412  |
| Institution from type (CIHI DAD <sup>†</sup> field code):      |                                                                                            |        |
| E                                                              | Emergency room                                                                             | 20,684 |
| Intervention codes for complex resections (CCI <sup>°</sup> ): |                                                                                            |        |
| 1.MG.87.^                                                      | Lymphadenectomy some intra abdominal nodes                                                 | 1,558  |
| 1.MG.89.^                                                      | Lymphadenectomy, intra abdominal nodes with surrounding tissue, retroperitoneal dissection | 130    |
| 1.NF.87.^                                                      | Excision partial, stomach                                                                  | 301    |
| 1.NF.89.^                                                      | Excision total stomach                                                                     | 6      |
| 1.NF.90.^                                                      | Excision total with reconstruction stomach                                                 | 4      |
| 1.NF.91.^                                                      | Excision radical stomach, with reconstruction                                              | 19     |
| 1.NP.86.^                                                      | Closure of fistula, large and small intestine                                              | 119    |
| 1.OA.87.^                                                      | Excision partial liver                                                                     | 607    |
| 1.OB.87.^                                                      | Excision partial, spleen                                                                   | 46     |
| 1.OB.89.^                                                      | Excision total spleen                                                                      | 321    |
| 1.OJ.87.^                                                      | Excision partial pancreas                                                                  | 84     |
| 1.OK.87.^                                                      | Excision partial pancreas + duodenum                                                       | 37     |
| 1.OK.89.^                                                      | Excision total pancreas + duodenum                                                         | 1      |
| 1.OK.91.^                                                      | Excision radical pancreas + duodenum                                                       | 4      |
| 1.OT.07.^                                                      | Hyperthermy abdominal cavity                                                               | 43     |
| 1.OT.35.^                                                      | Pharmacotherapy local abdominal cavity                                                     | 115    |
| 1.OT.52.^                                                      | Drainage abdominal cavity                                                                  | 1,867  |
| 1.OT.72.^                                                      | Adhesiolysis                                                                               | 4,850  |
| 1.OT.87.^                                                      | Excision partial abdominal cavity                                                          | 982    |
| 1.OT.91.^                                                      | Excision radical abdominal cavity                                                          | 88     |
| 1.OW.^                                                         | Therapeutic interventions on surgically constructed sites in digestive and biliary tract   | 306    |
| 1.PB.87.^                                                      | Excision partial adrenal gland                                                             | 14     |
| 1.PB.89.^                                                      | Excision total adrenal gland                                                               | 16     |
| 1.PC. 87.^                                                     | Excision partial kidney                                                                    | 43     |
| 1.PC. 89.^                                                     | Excision total kidney                                                                      | 66     |
| 1.PC. 91.^                                                     | Excision radical kidney                                                                    | 94     |
| 1.PG.72.^                                                      | Release ureter                                                                             | 364    |
| 1.PG.80.^                                                      | Repair ureter                                                                              | 130    |
| 1.PG.82.^                                                      | Reattachment ureter                                                                        | 2      |
| 1.PG.87.^                                                      | Excision partial ureter                                                                    | 117    |
| 1.PG.89.^                                                      | Excision total ureter                                                                      | 12     |
| 1.PM.87.^                                                      | Excision partial bladder                                                                   | 770    |
| 1.PM.89.^                                                      | Excision total bladder                                                                     | 4      |
| 1.PM.90.^                                                      | Excision total with reconstruction bladder                                                 | 9      |

|    |                                         |                                                                        |        |
|----|-----------------------------------------|------------------------------------------------------------------------|--------|
| 1  | 1.PM.91.^                               | Excision radical bladder                                               | 31     |
| 2  | 1.PM.92.^                               | Excision radical + reconstruction bladder                              | 65     |
| 3  | 1.PV.^.^                                | Therapeutic interventions on surgically created sites in urinary tract | 7      |
| 4  | 1.RB.87.^                               | Excision partial ovary                                                 | 173    |
| 5  | 1.RB.89.^                               | Excision total ovary                                                   | 351    |
| 6  | 1.RD.89.^                               | Excision total ovary with fallopian tube                               | 1,535  |
| 7  | 1.RM.87.^                               | Excision partial uterus and surrounding structures                     | 178    |
| 8  | 1.RM.89.^                               | Excision total uterus and surrounding structures                       | 532    |
| 9  | 1.RM.91.^                               | Excision radical uterus and surrounding structures                     | 45     |
| 10 | 1.RS.87.^                               | Excision partial vagina                                                | 70     |
| 11 | 1.SF.87.^                               | Excision partial, sacrum and coccyx                                    | 2      |
| 12 | 1.SF.91.^                               | Excision radical, sacrum and coccyx                                    | 1      |
| 13 | 1.SL.87.^                               | Excision partial, ribs                                                 | 1      |
| 14 | 1.SQ.87.^                               | Excision partial, pelvis                                               | 4      |
| 15 | 1.SQ.91.^                               | Excision radical, pelvis                                               | 2      |
| 16 | 1.SQ.93.^                               | Amputation, pelvis                                                     | 1      |
| 17 | 1.SY.72.^                               | Release, muscles of the chest and abdomen                              | 2      |
| 18 | 1.SY.80.^                               | Repair, muscles of the chest and abdomen                               | 6,650  |
| 19 | 1.SY.84.^                               | Construction or reconstruction, muscles of the chest and abdomen       | 11     |
| 20 | 1.SY.87.^                               | Excision partial, muscles of the chest and abdomen                     | 39     |
| 21 | 1.SZ.87.^                               | Excision partial, soft tissues of the chest and abdomen                | 386    |
| 22 | 1.YS.78.^                               | Repair by decreasing size, skin of abdomen and trunk                   | 6      |
| 23 | 1.YS.87.^                               | Excision partial, skin of abdomen and trunk                            | 125    |
| 24 | Total complex resections                |                                                                        | 20,528 |
| 25 | Total after considering duplicate cases |                                                                        | 18,303 |

\*International Classification of Diseases and Related Health Problems, 10<sup>th</sup> Revision, Canada

† Canadian Institute for Health Information Discharge Abstract Database

∞ Canadian Classification of Health Interventions

1  
2  
3  
4  
5  
6  
7  
8  
9  
10  
11  
12  
13  
14  
15  
16  
17  
18  
19  
20  
21  
22  
23  
24  
25  
26  
27  
28  
29  
30  
31  
32  
33  
34  
35  
36  
37  
38  
39  
40  
41  
42  
43  
44  
45  
46  
47  
48  
49  
50  
51  
52  
53  
54  
55  
56  
57  
58  
59  
60

**Appendix B.** Number of OC and LC and proportional use of LC by province (*online only*)

Annual number of OC and LC: Newfoundland

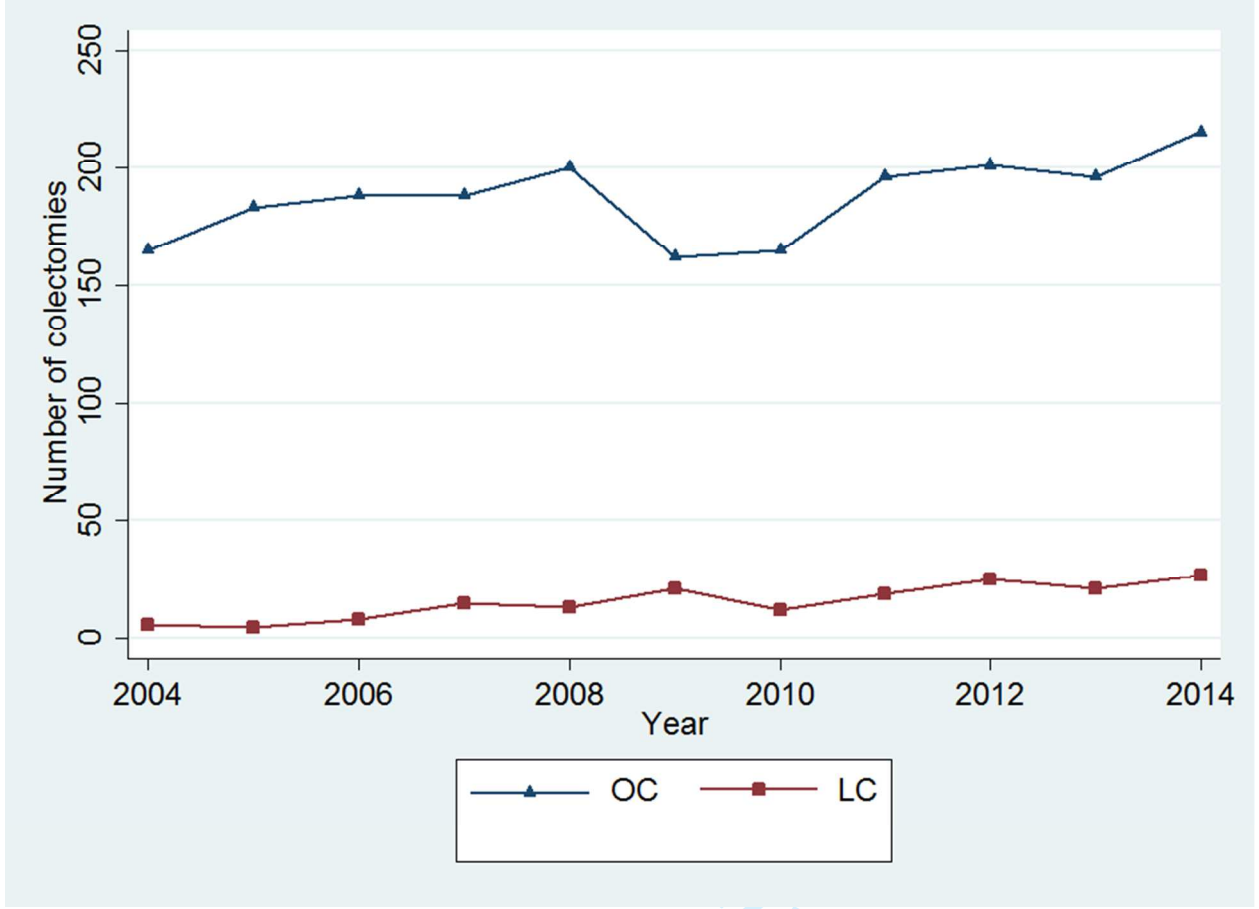

Annual proportional use of LC: Newfoundland

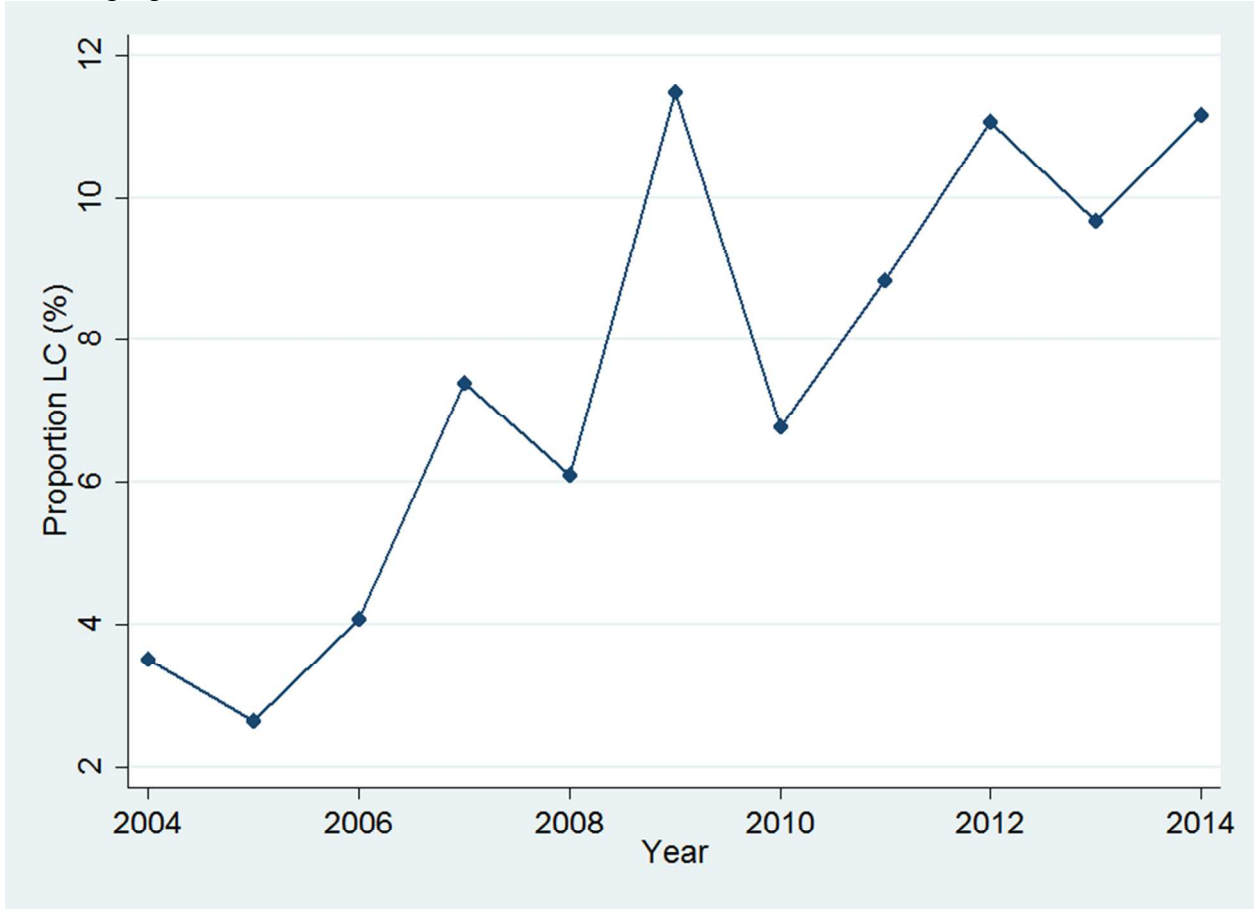

Initial

1  
2  
3  
4  
5  
6  
7  
8  
9  
10  
11  
12  
13  
14  
15  
16  
17  
18  
19  
20  
21  
22  
23  
24  
25  
26  
27  
28  
29  
30  
31  
32  
33  
34  
35  
36  
37  
38  
39  
40  
41  
42  
43  
44  
45  
46  
47  
48  
49  
50  
51  
52  
53  
54  
55  
56  
57  
58  
59  
60

Annual number of OC and LC: Nova Scotia

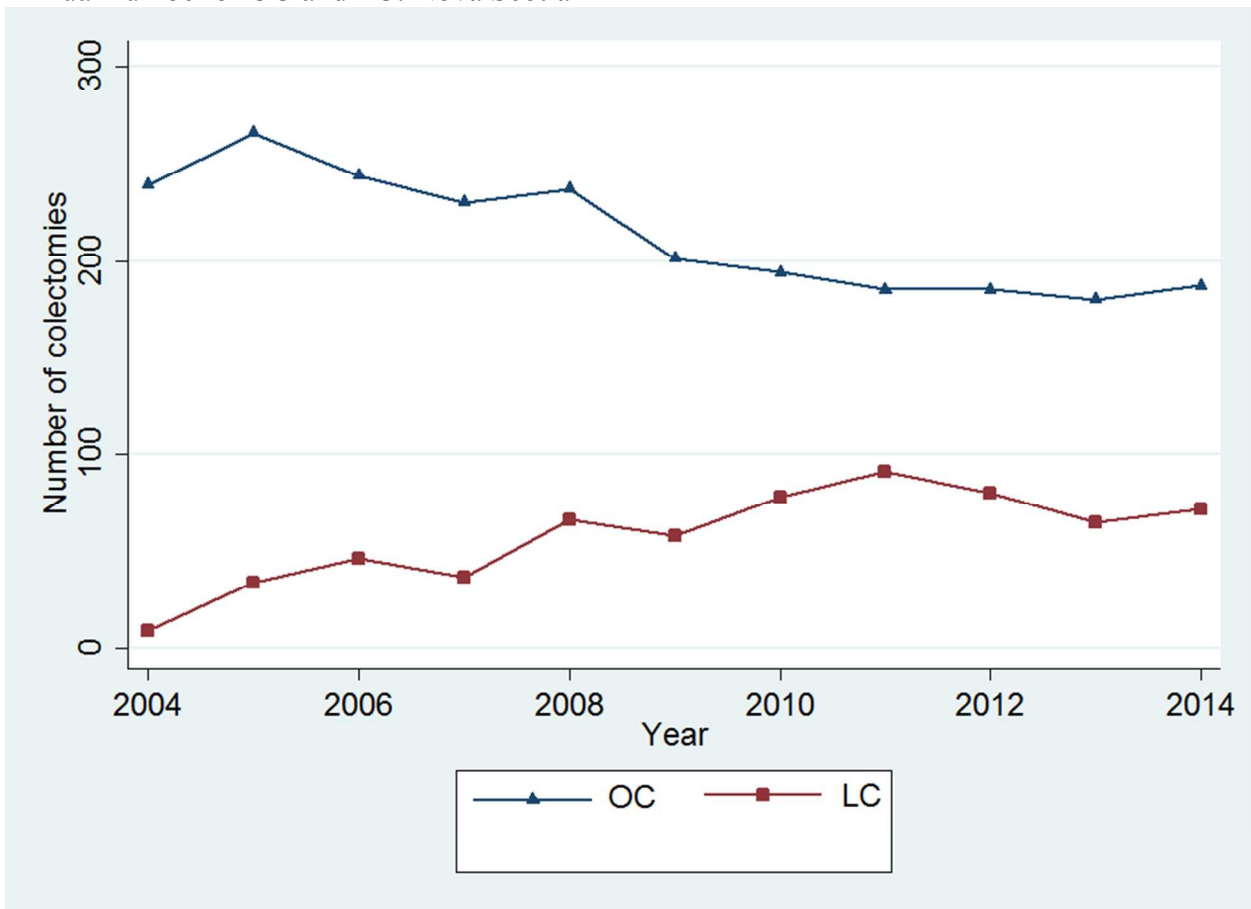

Initial

Annual proportional use of LC: Nova Scotia

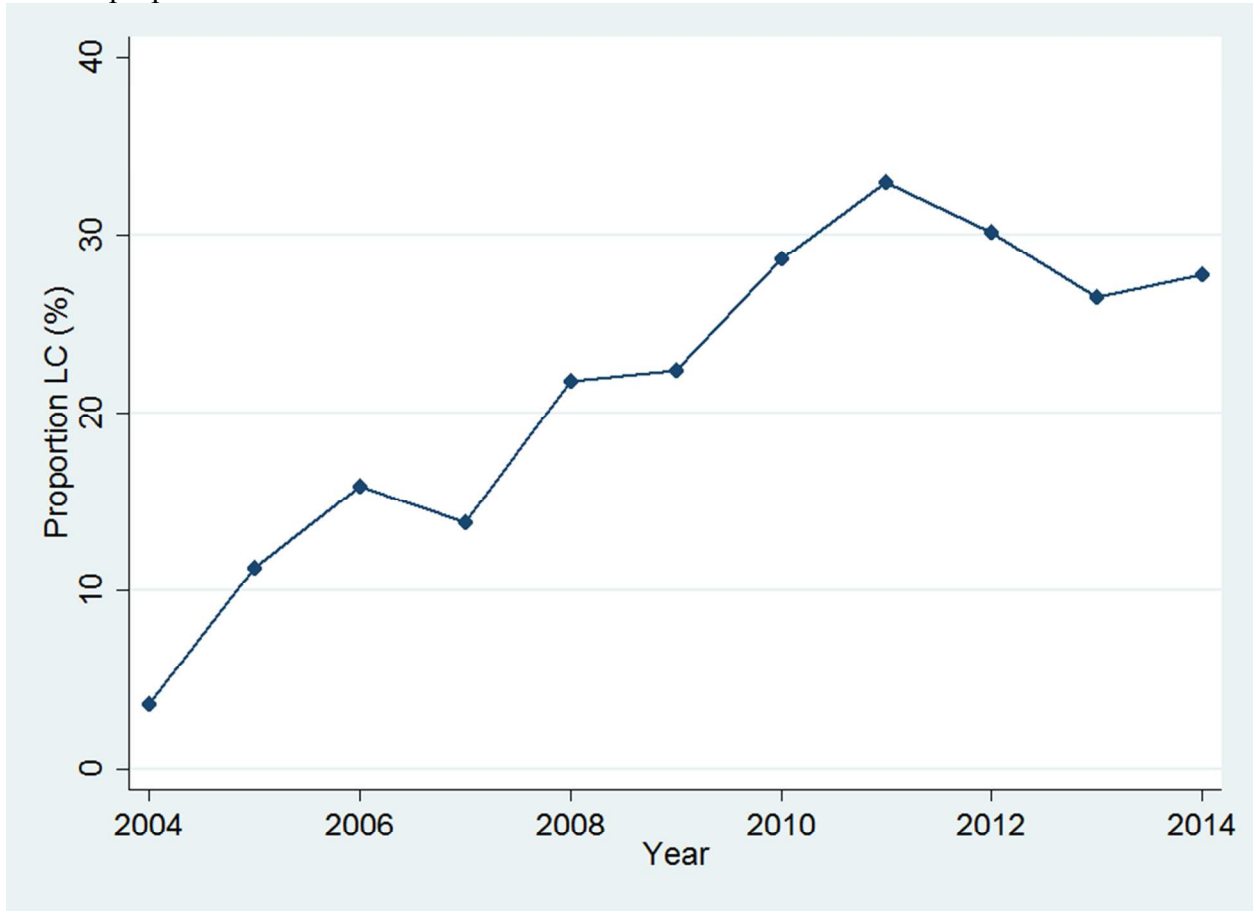

Initial

1  
2  
3  
4  
5  
6  
7  
8  
9  
10  
11  
12  
13  
14  
15  
16  
17  
18  
19  
20  
21  
22  
23  
24  
25  
26  
27  
28  
29  
30  
31  
32  
33  
34  
35  
36  
37  
38  
39  
40  
41  
42  
43  
44  
45  
46  
47  
48  
49  
50  
51  
52  
53  
54  
55  
56  
57  
58  
59  
60

Annual number of OC and LC: Prince Edward Island

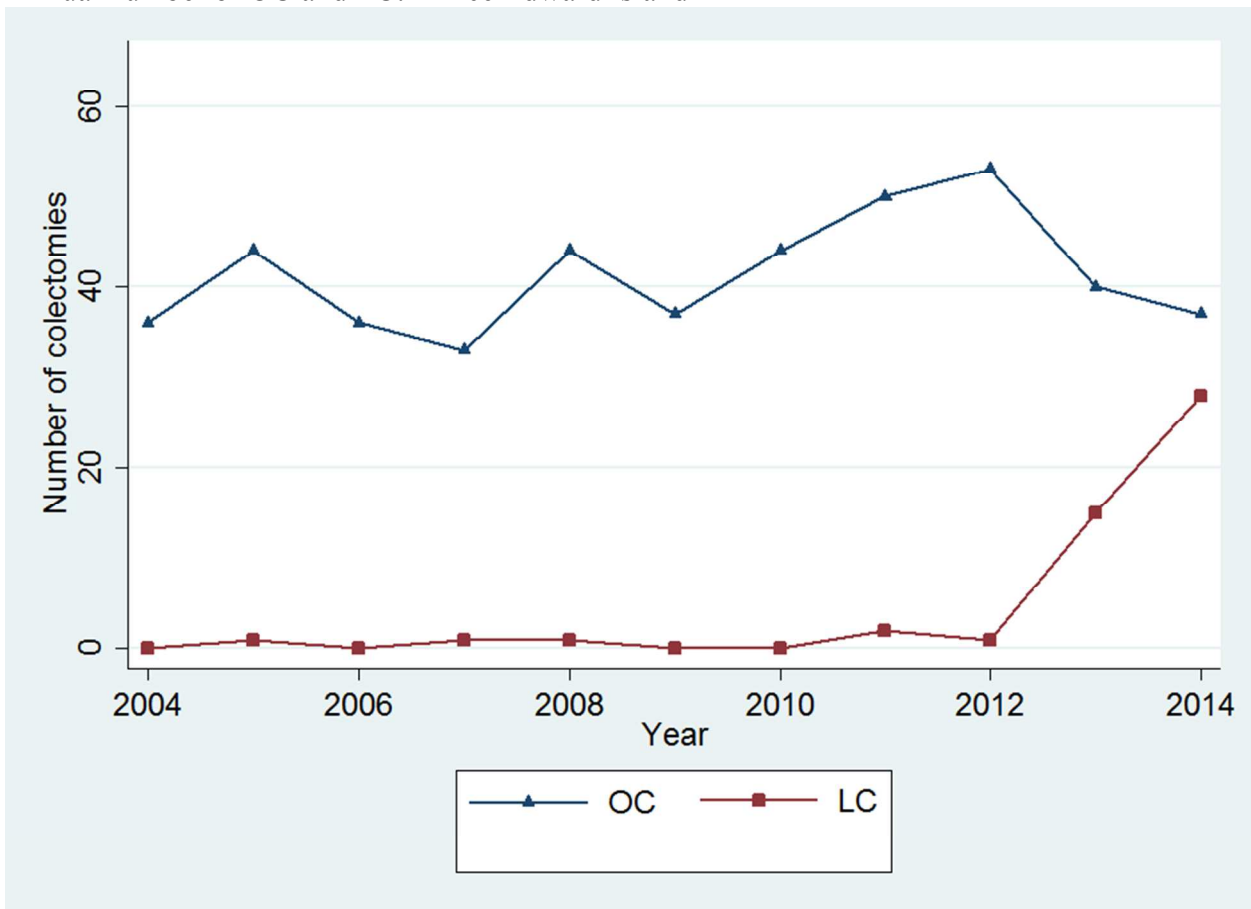



Annual proportional use of LC: Prince Edward Island

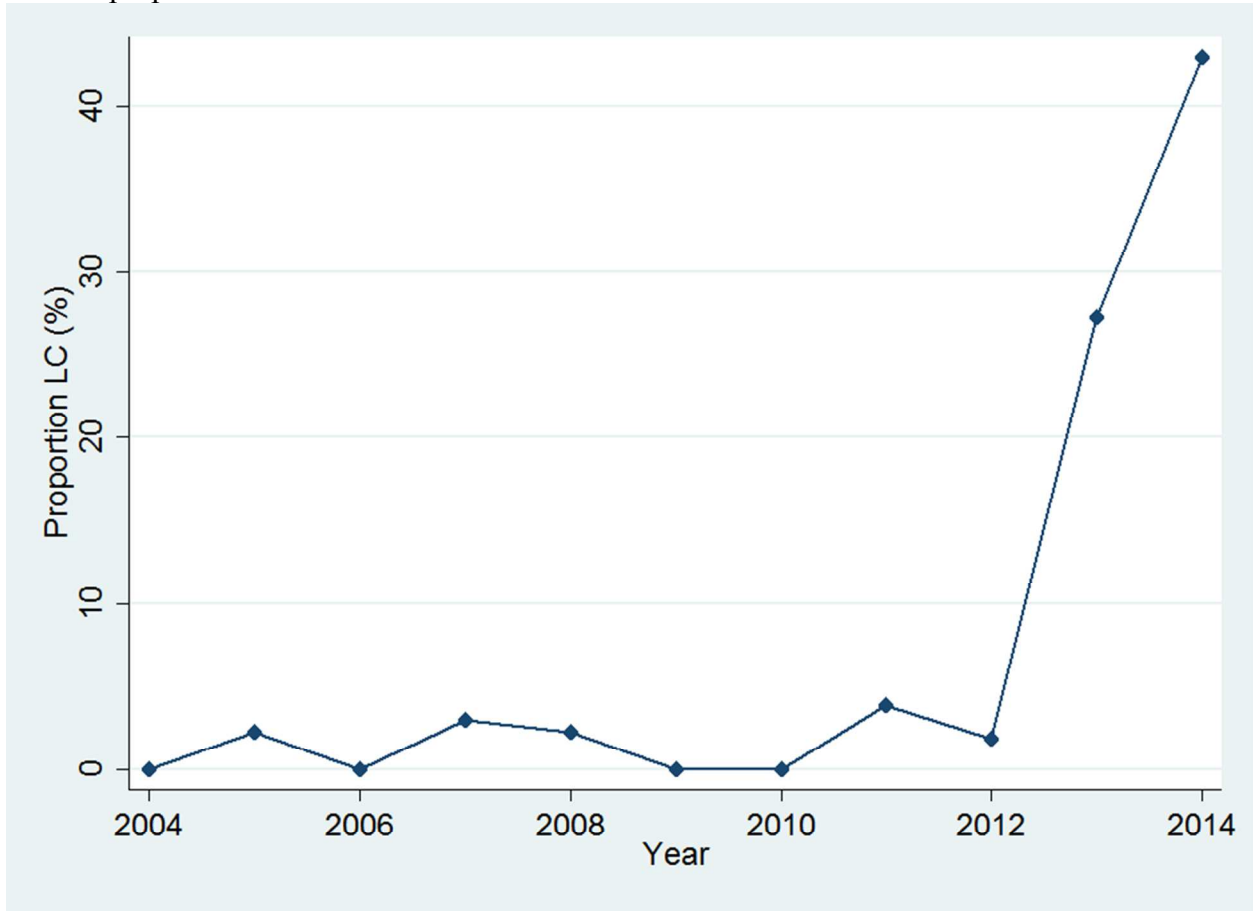

Initial

Annual number of OC and LC: New Brunswick

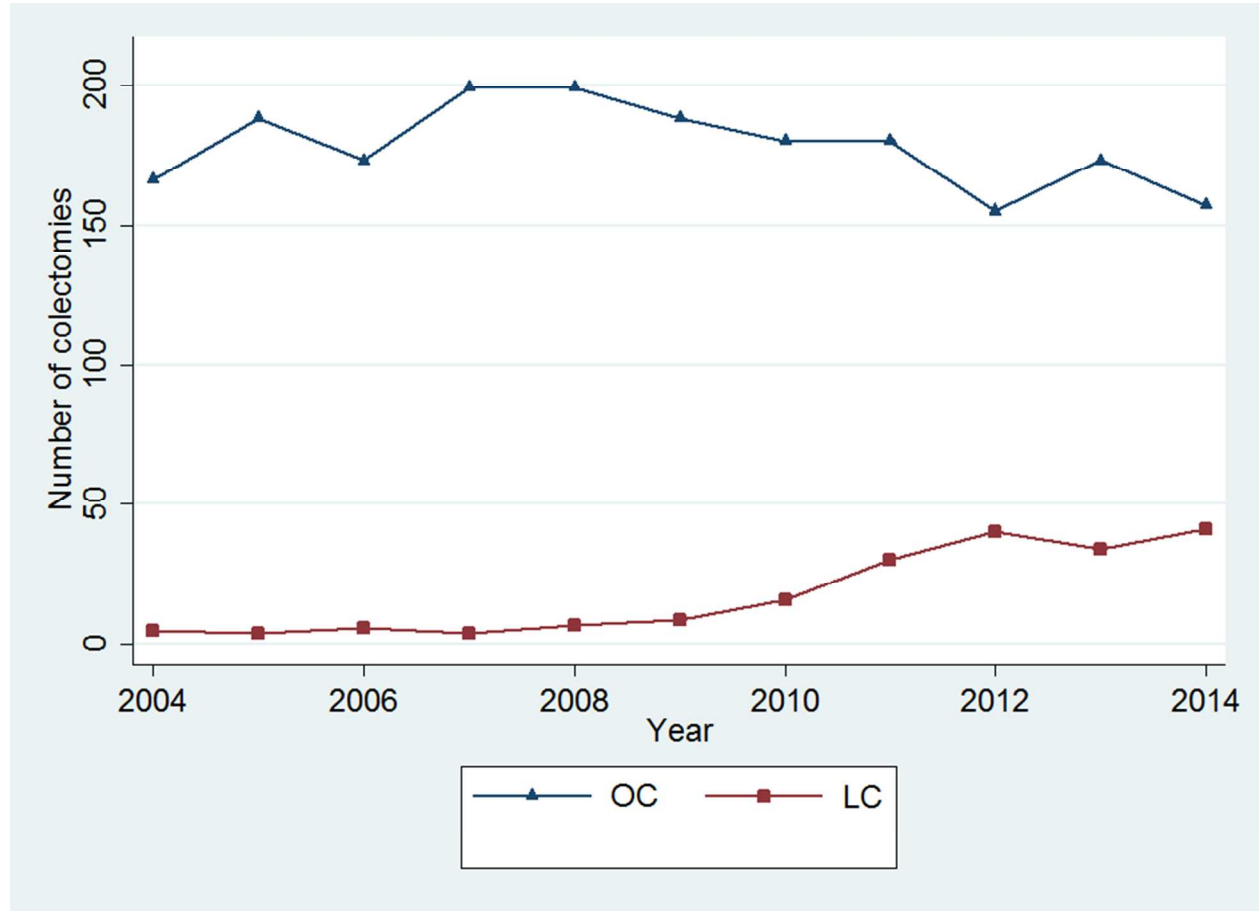

Annual proportional use of LC: New Brunswick

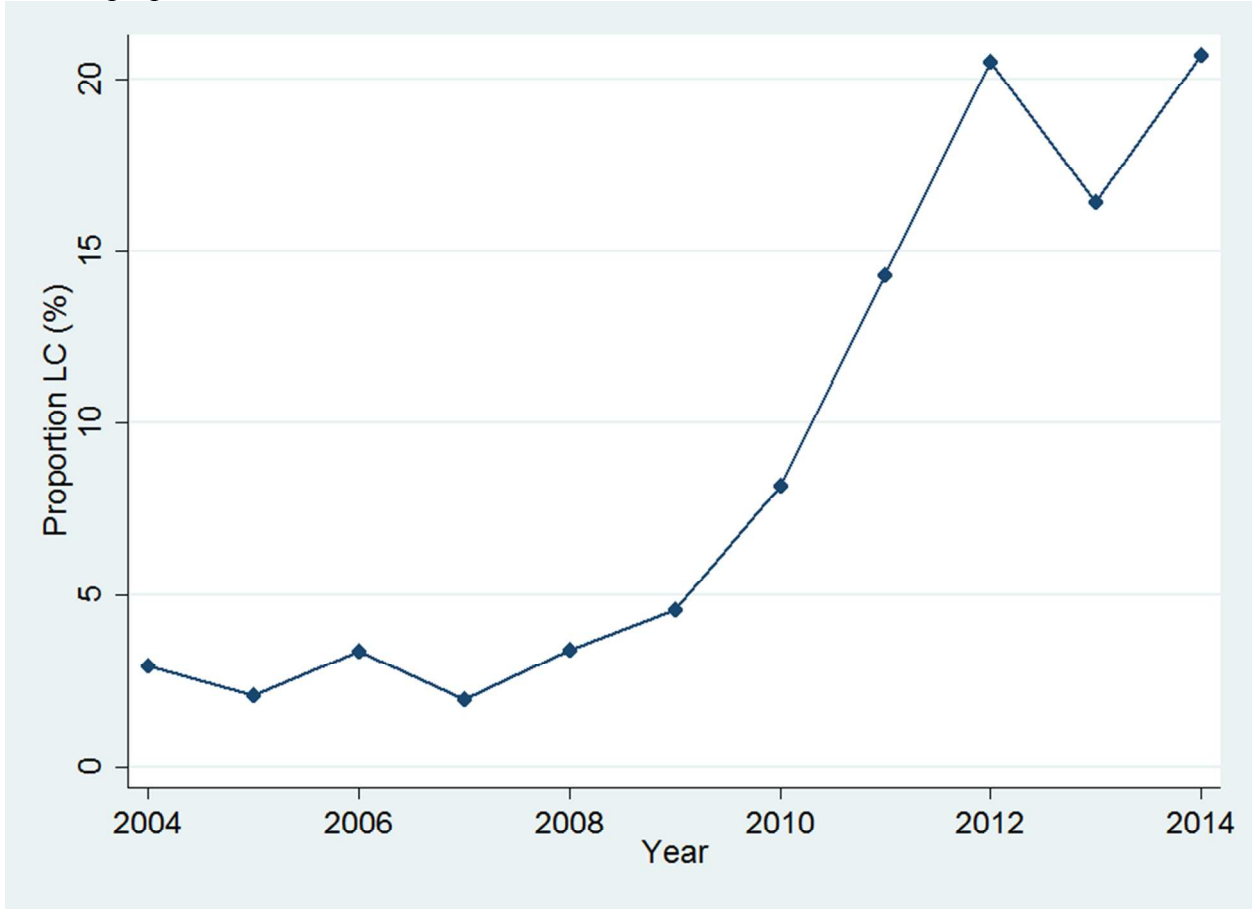

Initial

1  
2  
3  
4  
5  
6  
7  
8  
9  
10  
11  
12  
13  
14  
15  
16  
17  
18  
19  
20  
21  
22  
23  
24  
25  
26  
27  
28  
29  
30  
31  
32  
33  
34  
35  
36  
37  
38  
39  
40  
41  
42  
43  
44  
45  
46  
47  
48  
49  
50  
51  
52  
53  
54  
55  
56  
57  
58  
59  
60

Annual number of OC and LC: Ontario

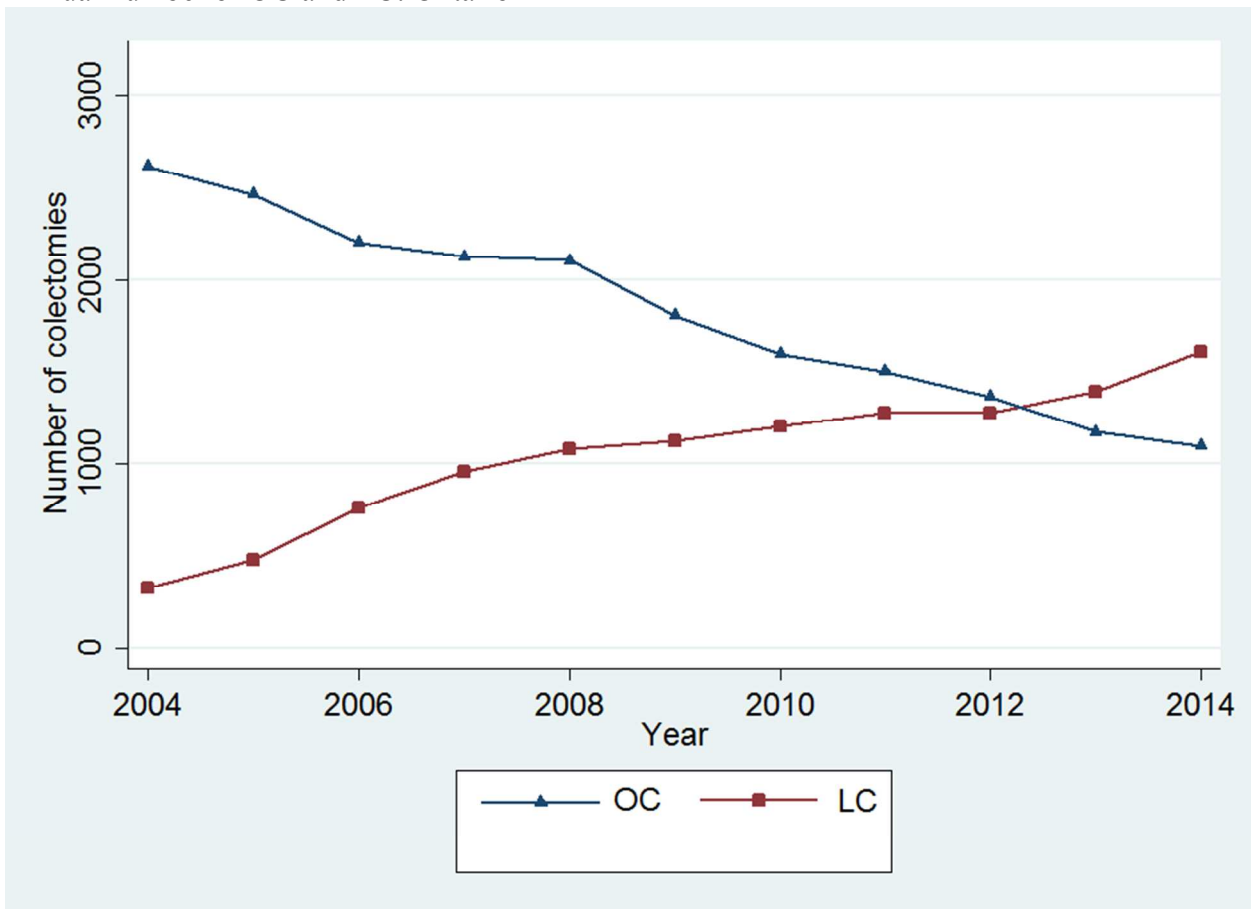

Initial

Annual proportional use of LC: Ontario

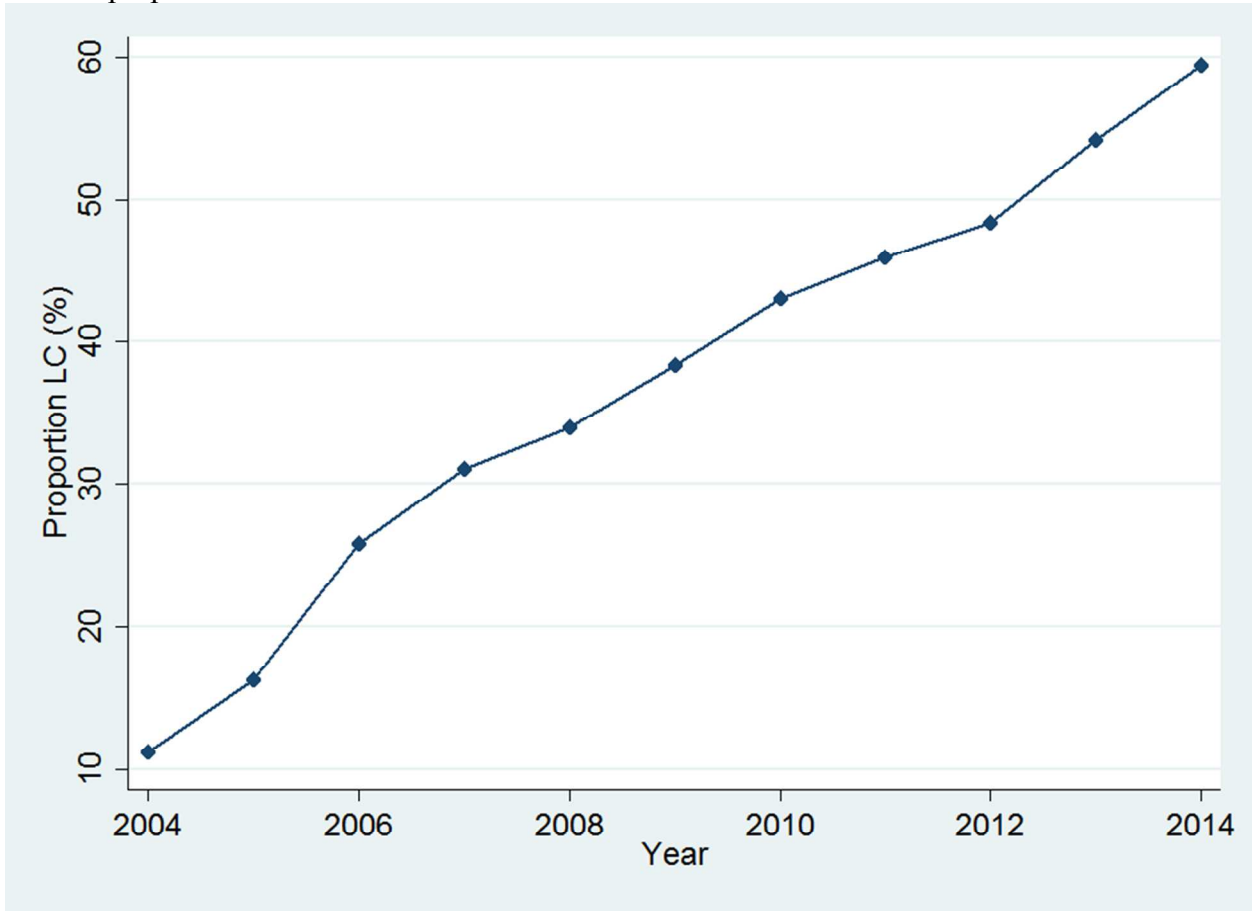

1  
2  
3  
4  
5  
6  
7  
8  
9  
10  
11  
12  
13  
14  
15  
16  
17  
18  
19  
20  
21  
22  
23  
24  
25  
26  
27  
28  
29  
30  
31  
32  
33  
34  
35  
36  
37  
38  
39  
40  
41  
42  
43  
44  
45  
46  
47  
48  
49  
50  
51  
52  
53  
54  
55  
56  
57  
58  
59  
60

Annual number of OC and LC: Manitoba

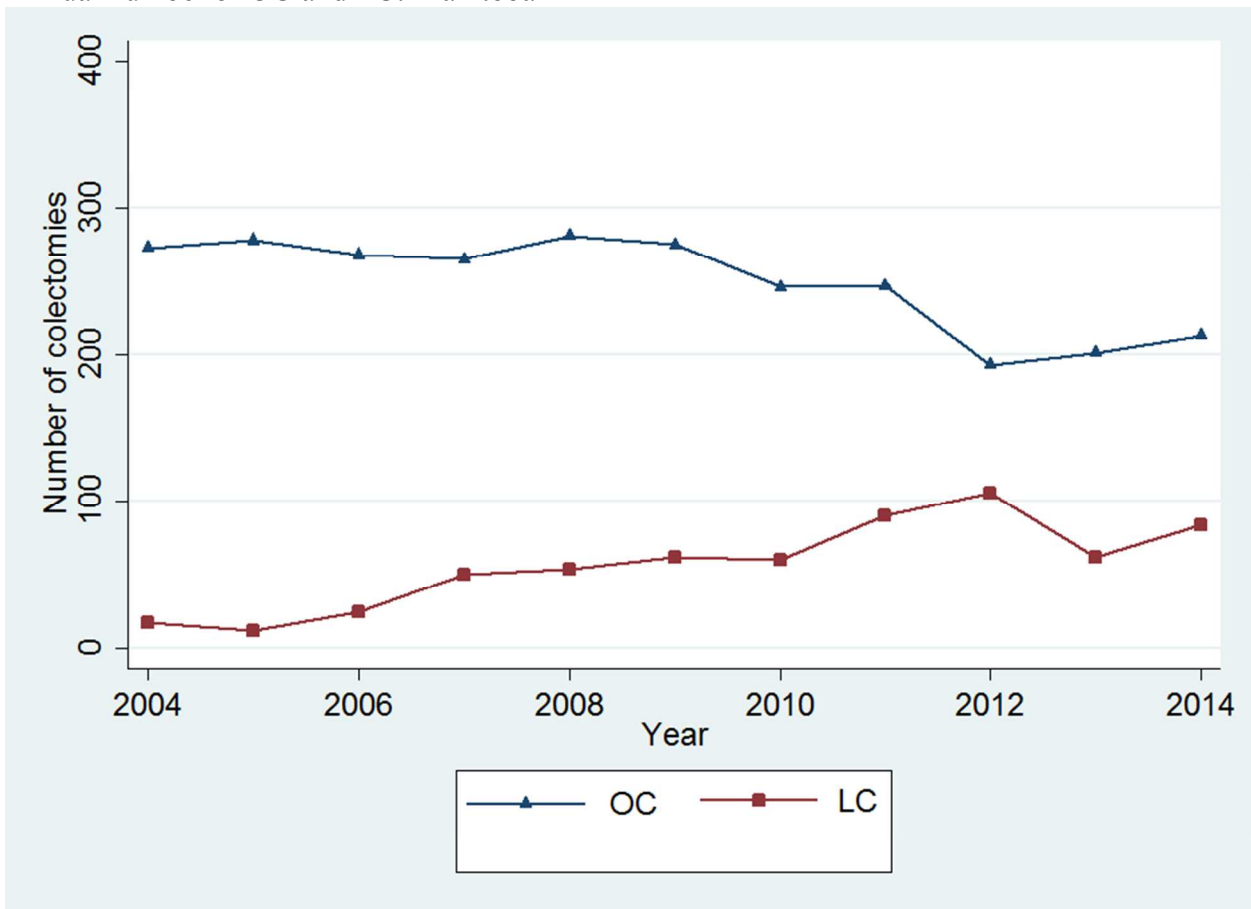

Initial

Annual proportional use of LC: Manitoba

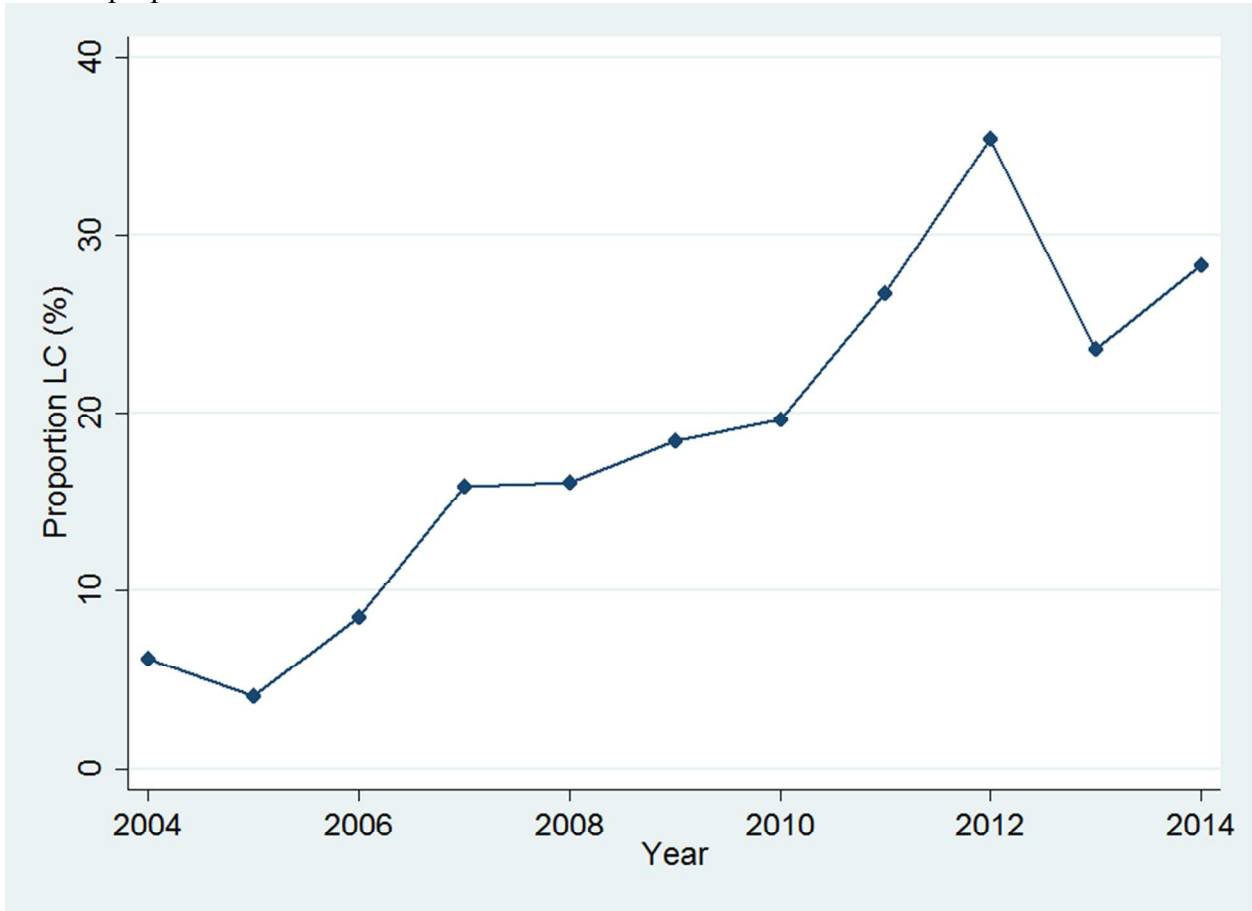

Initial

1  
2  
3  
4  
5  
6  
7  
8  
9  
10  
11  
12  
13  
14  
15  
16  
17  
18  
19  
20  
21  
22  
23  
24  
25  
26  
27  
28  
29  
30  
31  
32  
33  
34  
35  
36  
37  
38  
39  
40  
41  
42  
43  
44  
45  
46  
47  
48  
49  
50  
51  
52  
53  
54  
55  
56  
57  
58  
59  
60

Annual number of OC and LC: Saskatchewan

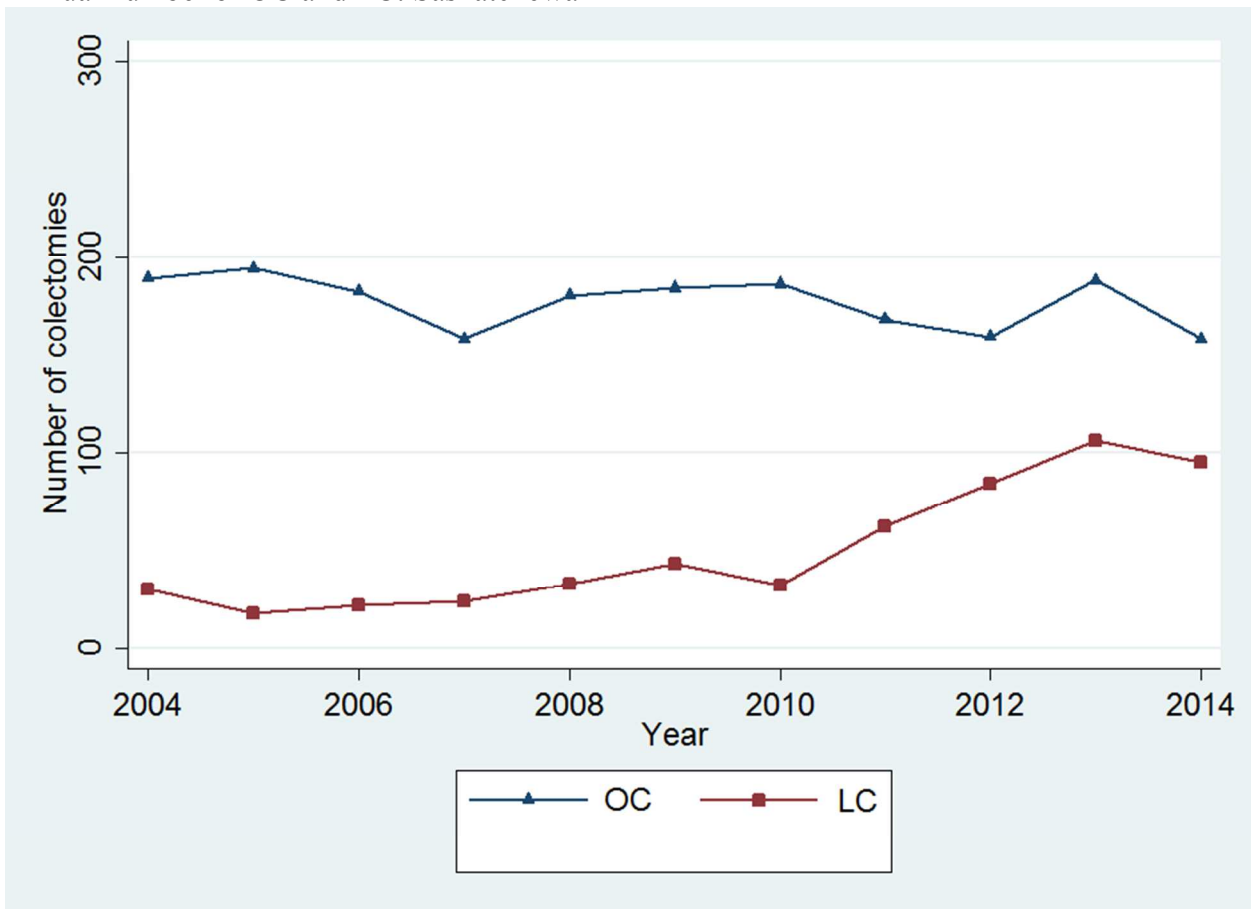



Annual proportional use of LC: Saskatchewan

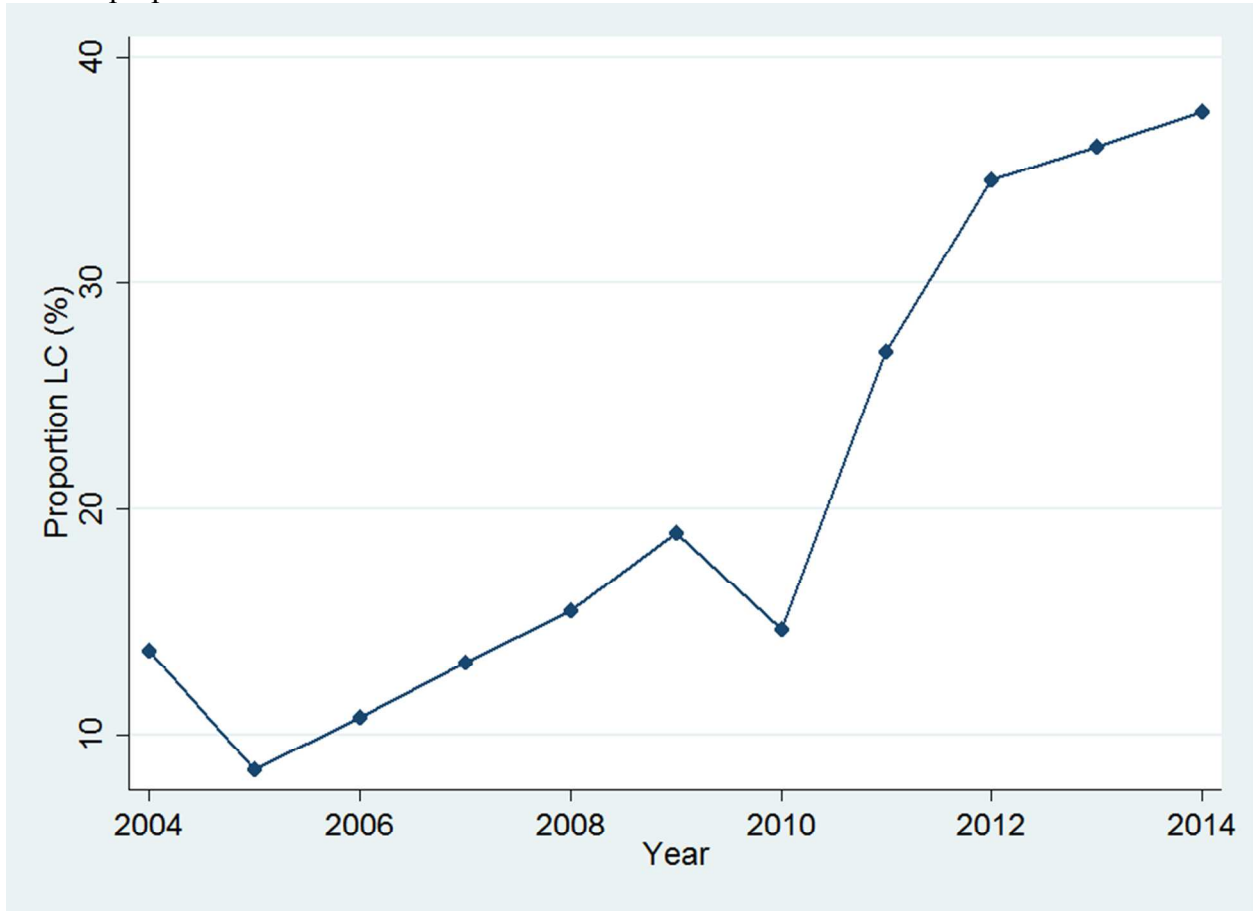

1  
2  
3  
4  
5  
6  
7  
8  
9  
10  
11  
12  
13  
14  
15  
16  
17  
18  
19  
20  
21  
22  
23  
24  
25  
26  
27  
28  
29  
30  
31  
32  
33  
34  
35  
36  
37  
38  
39  
40  
41  
42  
43  
44  
45  
46  
47  
48  
49  
50  
51  
52  
53  
54  
55  
56  
57  
58  
59  
60

Annual number of OC and LC: Alberta

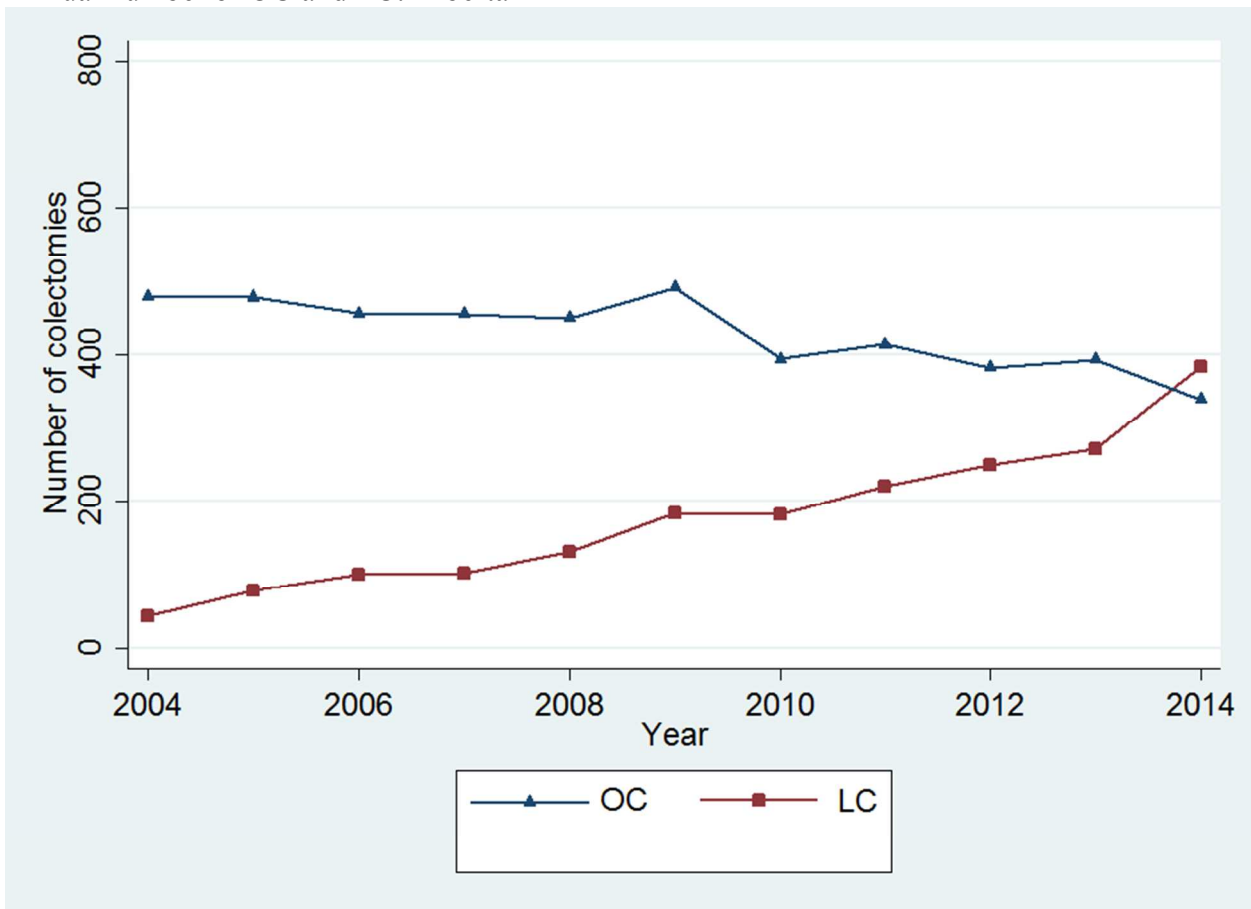

Annual proportional use of LC: Alberta

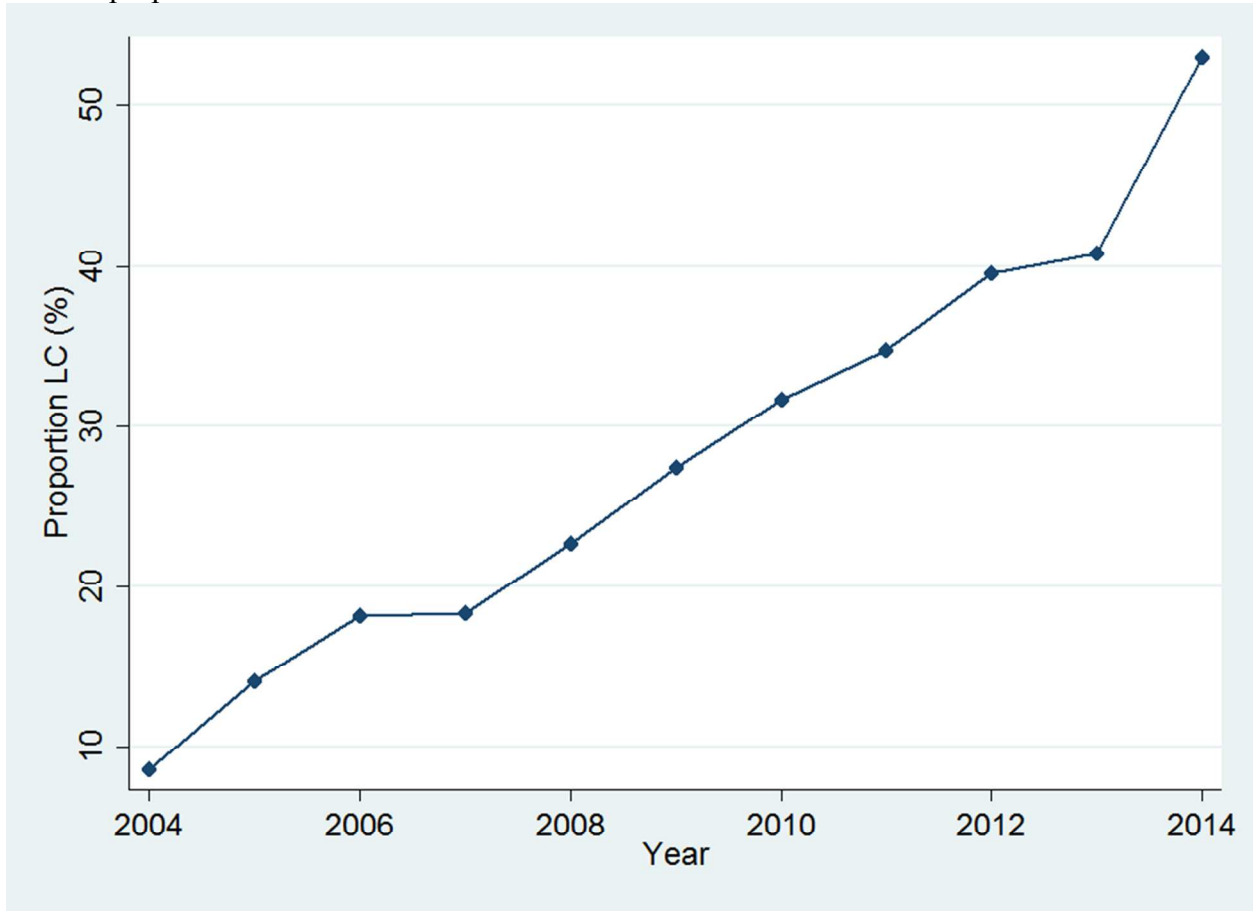

Initial

1  
2  
3  
4  
5  
6  
7  
8  
9  
10  
11  
12  
13  
14  
15  
16  
17  
18  
19  
20  
21  
22  
23  
24  
25  
26  
27  
28  
29  
30  
31  
32  
33  
34  
35  
36  
37  
38  
39  
40  
41  
42  
43  
44  
45  
46  
47  
48  
49  
50  
51  
52  
53  
54  
55  
56  
57  
58  
59  
60

Annual number of OC and LC: British Columbia

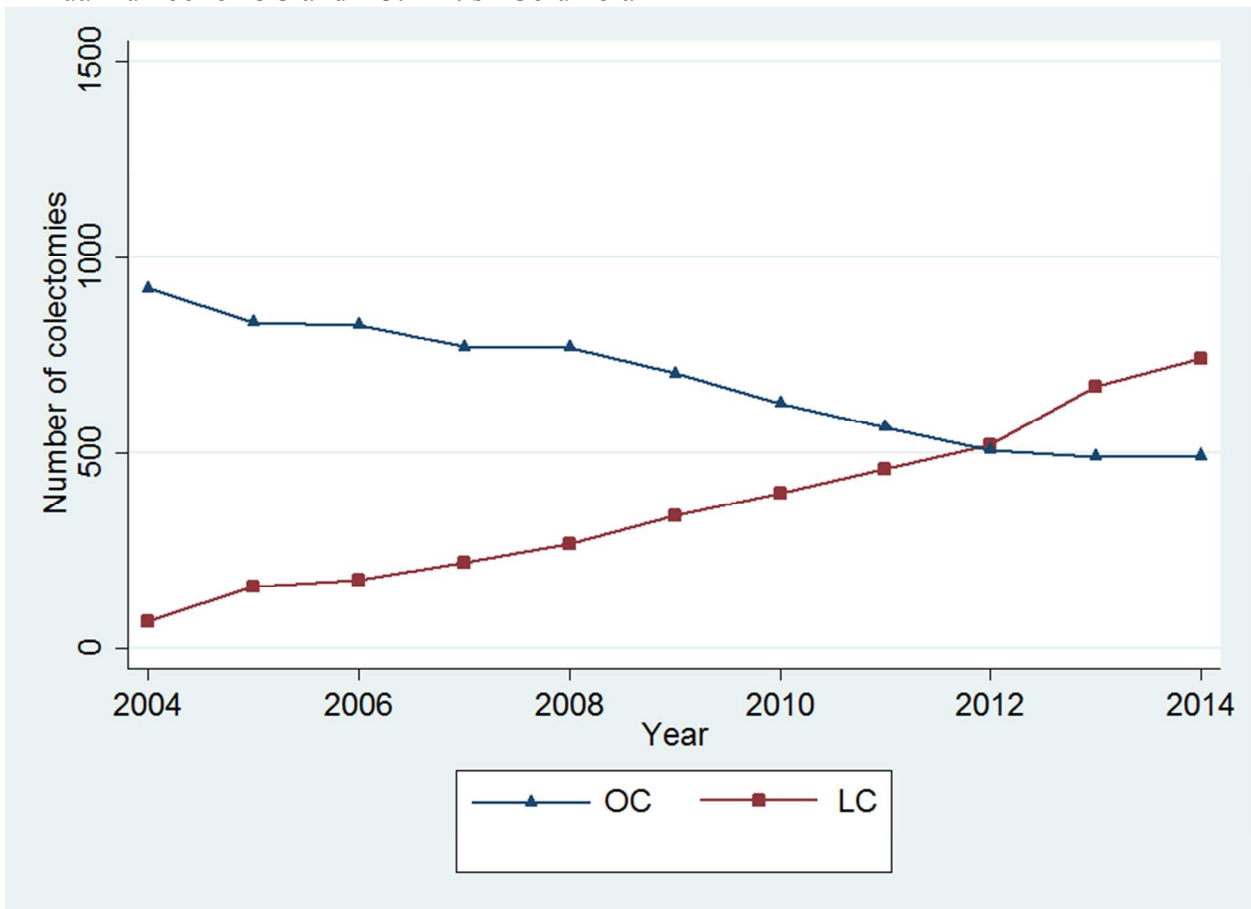

Initial

Annual proportional use of LC: British Columbia

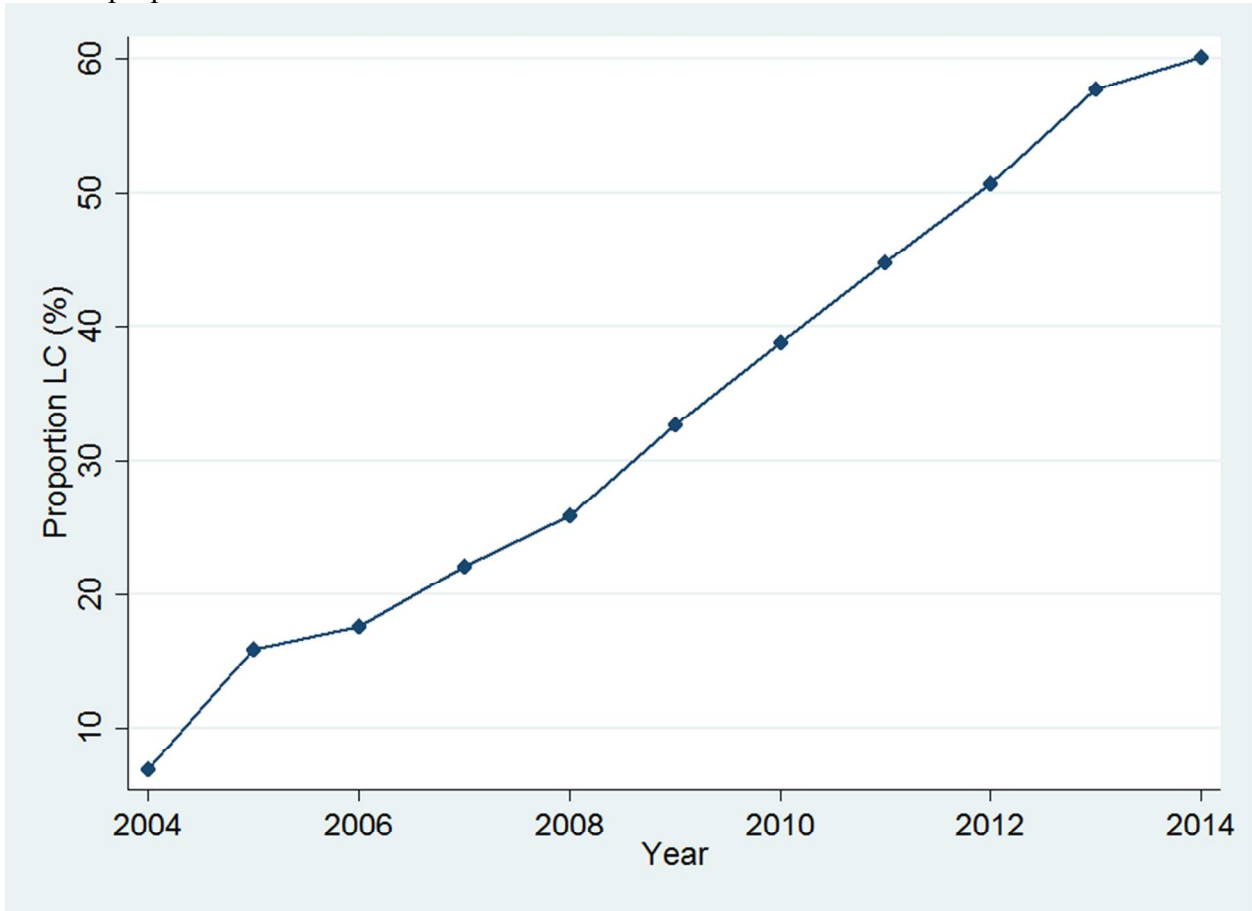

Supplement: supp_6.3.E384_2018-0002-original-submission.pdf [file supp_6.3.E384_2018-0002-original-submission.pdf]
