# Supplementary material
Source: PubMed Central journal article supplement (PMC6182107)
Supplement: supp_6.3.E384_2018-0002-1-at.pdf [file supp_6.3.E384_2018-0002-1-at.pdf]

**Appendix 1 (as supplied by the authors): Canadian Classification of Health Interventions (CCI) procedure codes for open and laparoscopic colectomy**

| <b>1.NM.87. Excision partial, large intestine</b> |            |                                                             |
|---------------------------------------------------|------------|-------------------------------------------------------------|
| Colocolostomy anastomosis* technique.             | 1.NM.87.DF | Laparoscopic, laparoscopic assisted, hand-assisted approach |
|                                                   | 1.NM.87.LA | Open approach                                               |
|                                                   | 1.NM.87.RN | Open approach                                               |
| Colorectal anastomosis technique                  | 1.NM.87.DE | Laparoscopic, laparoscopic assisted, hand-assisted approach |
|                                                   | 1.NM.87.RD | Open approach                                               |
| Enterocolostomy anastomosis technique             | 1.NM.87.DN | Laparoscopic, laparoscopic assisted, hand-assisted approach |
|                                                   | 1.NM.87.RE | Open approach                                               |
| Stoma formation and distal closure                | 1.NM.87.DX | Laparoscopic, laparoscopic assisted, hand-assisted approach |
|                                                   | 1.NM.87.TF | Open approach                                               |
| Stoma formation with creation of mucus fistula    | 1.NM.87.DY | Laparoscopic, laparoscopic assisted, hand-assisted approach |
|                                                   | 1.NM.87.TG | Open approach                                               |
| <b>1.NM.89. Excision total, large intestine</b>   |            |                                                             |
| Ileorectal anastomosis                            | 1.NM.89.DF | Laparoscopic, laparoscopic assisted, hand-assisted approach |
|                                                   | 1.NM.89.RN | Open approach                                               |
| Stoma formation with distal closure               | 1.NM.89.DX | Laparoscopic, laparoscopic assisted, hand-assisted approach |
|                                                   | 1.NM.89.TF | Open approach                                               |

## Appendix 1 cont'd

| <b>1.NM.91. Excision radical, large intestine</b>       |            |                                                             |
|---------------------------------------------------------|------------|-------------------------------------------------------------|
| Colocolostomy anastomosis technique.                    | 1.NM.91.DF | Laparoscopic, laparoscopic assisted, hand-assisted approach |
|                                                         | 1.NM.91.RN | Open approach                                               |
| Colorectal anastomosis technique                        | 1.NM.91.DE | Laparoscopic, laparoscopic assisted, hand-assisted approach |
|                                                         | 1.NM.91.RD | Open approach                                               |
| Enterocolostomy anastomosis technique                   | 1.NM.91.DN | Laparoscopic, laparoscopic assisted, hand-assisted approach |
|                                                         | 1.NM.91.RE | Open approach                                               |
| Stoma formation with distal closure                     | 1.NM.91.DX | Laparoscopic, laparoscopic assisted, hand-assisted approach |
|                                                         | 1.NM.91.TF | Open approach                                               |
| Stoma formation with creation of mucus fistula          | 1.NM.91.DY | Laparoscopic, laparoscopic assisted, hand-assisted approach |
|                                                         | 1.NM.91.TG | Open approach                                               |
| <b>1.NQ.87. Excision partial, rectum</b>                |            |                                                             |
| Colorectal anastomosis                                  | 1.NQ.87.DE | Laparoscopic, laparoscopic assisted, hand-assisted approach |
|                                                         | 1.NQ.87.RD | Open approach                                               |
| Closure of rectum with colostomy (Hartmann's technique) | 1.NQ.87.DX | Laparoscopic, laparoscopic assisted, hand-assisted approach |
|                                                         | 1.NQ.87.TF | Open approach                                               |
