# Supplementary material
Source: PubMed Central journal article supplement (PMC6182107)
Supplement: supp_6.3.E384_2018-0002-2-at.pdf [file supp_6.3.E384_2018-0002-2-at.pdf]

## Appendix 2 (as supplied by the authors): Codes for exclusion criteria

| Diagnostic codes (ICD-10-CA)*:                                 |                                                                                            | N      |
|----------------------------------------------------------------|--------------------------------------------------------------------------------------------|--------|
| Z32.1                                                          | Pregnancy confirmed                                                                        | 22     |
| K65.0                                                          | Peritonitis                                                                                | 2,412  |
| Institution from type (CIHI DAD <sup>†</sup> field code):      |                                                                                            |        |
| E                                                              | Emergency room                                                                             | 20,684 |
| Intervention codes for complex resections (CCI <sup>°</sup> ): |                                                                                            |        |
| 1.MG.87.^                                                      | Lymphadenectomy some intra abdominal nodes                                                 | 1,558  |
| 1.MG.89.^                                                      | Lymphadenectomy, intra abdominal nodes with surrounding tissue, retroperitoneal dissection | 130    |
| 1.NF.87.^                                                      | Excision partial, stomach                                                                  | 301    |
| 1.NF.89.^                                                      | Excision total stomach                                                                     | 6      |
| 1.NF.90.^                                                      | Excision total with reconstruction stomach                                                 | 4      |
| 1.NF.91.^                                                      | Excision radical stomach, with reconstruction                                              | 19     |
| 1.NP.86.^                                                      | Closure of fistula, large and small intestine                                              | 119    |
| 1.OA.87.^                                                      | Excision partial liver                                                                     | 607    |
| 1.OB.87.^                                                      | Excision partial, spleen                                                                   | 46     |
| 1.OB.89.^                                                      | Excision total spleen                                                                      | 321    |
| 1.OJ.87.^                                                      | Excision partial pancreas                                                                  | 84     |
| 1.OK.87.^                                                      | Excision partial pancreas + duodenum                                                       | 37     |
| 1.OK.89.^                                                      | Excision total pancreas + duodenum                                                         | 1      |
| 1.OK.91.^                                                      | Excision radical pancreas + duodenum                                                       | 4      |
| 1.OT.07.^                                                      | Hyperthermy abdominal cavity                                                               | 43     |
| 1.OT.35.^                                                      | Pharmacotherapy local abdominal cavity                                                     | 115    |
| 1.OT.52.^                                                      | Drainage abdominal cavity                                                                  | 1,867  |
| 1.OT.72.^                                                      | Adhesiolysis                                                                               | 4,850  |
| 1.OT.87.^                                                      | Excision partial abdominal cavity                                                          | 982    |
| 1.OT.91.^                                                      | Excision radical abdominal cavity                                                          | 88     |
| 1.OW.^.^                                                       | Therapeutic interventions on surgically constructed sites in digestive and biliary tract   | 306    |
| 1.PB.87.^                                                      | Excision partial adrenal gland                                                             | 14     |
| 1.PB.89.^                                                      | Excision total adrenal gland                                                               | 16     |
| 1.PC. 87.^                                                     | Excision partial kidney                                                                    | 43     |
| 1.PC. 89.^                                                     | Excision total kidney                                                                      | 66     |
| 1.PC. 91.^                                                     | Excision radical kidney                                                                    | 94     |
| 1.PG.72.^                                                      | Release ureter                                                                             | 364    |
| 1.PG.80.^                                                      | Repair ureter                                                                              | 130    |
| 1.PG.82.^                                                      | Reattachment ureter                                                                        | 2      |
| 1.PG.87.^                                                      | Excision partial ureter                                                                    | 117    |
| 1.PG.89.^                                                      | Excision total ureter                                                                      | 12     |
| 1.PM.87.^                                                      | Excision partial bladder                                                                   | 770    |
| 1.PM.89.^                                                      | Excision total bladder                                                                     | 4      |

|                                         |                                                                        |        |
|-----------------------------------------|------------------------------------------------------------------------|--------|
| 1.PM.90.^                               | Excision total with reconstruction bladder                             | 9      |
| 1.PM.91.^                               | Excision radical bladder                                               | 31     |
| 1.PM.92.^                               | Excision radical + reconstruction bladder                              | 65     |
| 1.PV.^.                                 | Therapeutic interventions on surgically created sites in urinary tract | 7      |
| 1.RB.87.^                               | Excision partial ovary                                                 | 173    |
| 1.RB.89.^                               | Excision total ovary                                                   | 351    |
| 1.RD.89.^                               | Excision total ovary with fallopian tube                               | 1,535  |
| 1.RM.87.^                               | Excision partial uterus and surrounding structures                     | 178    |
| 1.RM.89.^                               | Excision total uterus and surrounding structures                       | 532    |
| 1.RM.91.^                               | Excision radical uterus and surrounding structures                     | 45     |
| 1.RS.87.^                               | Excision partial vagina                                                | 70     |
| 1.SF.87.^                               | Excision partial, sacrum and coccyx                                    | 2      |
| 1.SF.91.^                               | Excision radical, sacrum and coccyx                                    | 1      |
| 1.SL.87.^                               | Excision partial, ribs                                                 | 1      |
| 1.SQ.87.^                               | Excision partial, pelvis                                               | 4      |
| 1.SQ.91.^                               | Excision radical, pelvis                                               | 2      |
| 1.SQ.93.^                               | Amputation, pelvis                                                     | 1      |
| 1.SY.72.^                               | Release, muscles of the chest and abdomen                              | 2      |
| 1.SY.80.^                               | Repair, muscles of the chest and abdomen                               | 6,650  |
| 1.SY.84.^                               | Construction or reconstruction, muscles of the chest and abdomen       | 11     |
| 1.SY.87.^                               | Excision partial, muscles of the chest and abdomen                     | 39     |
| 1.SZ.87.^                               | Excision partial, soft tissues of the chest and abdomen                | 386    |
| 1.YS.78.^                               | Repair by decreasing size, skin of abdomen and trunk                   | 6      |
| 1.YS.87.^                               | Excision partial, skin of abdomen and trunk                            | 125    |
| Total complex resections                |                                                                        | 20,528 |
| Total after considering duplicate cases |                                                                        | 18,303 |

\*International Classification of Diseases and Related Health Problems, 10<sup>th</sup> Revision, Canada

† Canadian Institute for Health Information Discharge Abstract Database

∞ Canadian Classification of Health Interventions
