# Supplementary material
Source: PubMed Central journal article supplement (PMC6182107)
Supplement: supp_6.3.E384_2018-0002-3-at.pdf [file supp_6.3.E384_2018-0002-3-at.pdf]

**Appendix 3 (as supplied by the authors): Patients undergoing elective laparoscopic and open colectomy for cancer by year of surgery and province**

| <b>Variable</b>                        | <b>Laparoscopic<br/>(N = 19,691)</b> | <b>Open<br/>(N = 43,813)</b> |
|----------------------------------------|--------------------------------------|------------------------------|
| <b>Year of surgery: N [% (95% CI)]</b> |                                      |                              |
| 2004                                   | 513 [2.6 (2.4-2.8)]                  | 5,088 [11.6 (11.3-11.9)]     |
| 2005                                   | 789 [4.0 (3.7-4.3)]                  | 4,932 [11.3 (10.9-11.6)]     |
| 2006                                   | 1,149 [5.8 (5.5-6.2)]                | 4,577 [10.5 (10.2-10.7)]     |
| 2007                                   | 1,410 [7.2 (6.8-7.5)]                | 4,428 [10.1 (9.8-10.4)]      |
| 2008                                   | 1,658 [8.4 (8.0-8.8)]                | 4,467 [10.2 (9.9-10.5)]      |
| 2009                                   | 1,842 [9.4 (8.9-9.8)]                | 4,048 [9.2 (8.9-9.5)]        |
| 2010                                   | 1,982 [10.1 (9.7-10.5)]              | 3,633 [8.3 (8.0-8.6)]        |
| 2011                                   | 2,250 [11.4 (10.9-11.9)]             | 3,510 [8.0 (7.8-8.3)]        |
| 2012                                   | 2,384 [12.1 (11.7-12.6)]             | 3,199 [7.3 (7.1-7.6)]        |
| 2013                                   | 2,634 [13.4 (12.9-13.9)]             | 3,035 [6.9 (6.7-7.2)]        |
| 2014                                   | 3,080 [15.6 (15.1-16.2)]             | 2,896 [6.6 (6.4-6.9)]        |
| <b>Province: N [% (95% CI)]</b>        |                                      |                              |
| Newfoundland                           | 172 [0.9 (0.8-1.0)]                  | 2,059 [4.7 (4.5-4.9)]        |
| Prince Edward Island                   | 49 [0.3(0.2-0.3)]                    | 454 [1.0 (0.9-1.1)]          |
| Nova Scotia                            | 636 [3.2 (2.9-3.5)]                  | 2,348 [5.4 (5.2-5.6)]        |
| New Brunswick                          | 196 [0.9 (0.8-1.0)]                  | 1,958 [4.5 (4.3-4.7)]        |
| Ontario                                | 11,506 [58.4 (57.7-59.1)]            | 20,088 [45.9 (45.4-46.3)]    |
| Manitoba                               | 623 [3.2 (2.9-3.4)]                  | 2,740 [6.3 (6.0-6.5)]        |
| Saskatchewan                           | 549 [2.8 (2.6-3.0)]                  | 1,946 [4.4 (4.3-4.6)]        |
| Alberta                                | 1,949 [9.9 (9.5-10.3)]               | 4,731 [10.8 (10.5-11.1)]     |
| British Columbia                       | 4,011 [20.4 (19.8-20.9)]             | 7,489 [17.1 (16.7-17.5)]     |
