# Supplementary material
Source: PubMed Central journal article supplement (PMC6182107)
Supplement: supp_6.3.E384_2018-0002-4-at.pdf [file supp_6.3.E384_2018-0002-4-at.pdf]

**Appendix 4 (as supplied by the authors): Mean proportion of elective laparoscopic surgeries for cancer by province with patient, surgeon and institution as unit of analysis**

| Province             | Mean proportion of laparoscopic surgeries |                               |                                   |
|----------------------|-------------------------------------------|-------------------------------|-----------------------------------|
|                      | Per patient <sup>1</sup> (n1)             | Per surgeon <sup>2</sup> (n2) | Per institution <sup>3</sup> (n3) |
| Newfoundland         | 0.08 (2,231)                              | 0.08 (74)                     | 0.06 (15)                         |
| Prince Edward Island | 0.10 (503)                                | 0.11 (16)                     | 0.07 (3)                          |
| Nova Scotia          | 0.21 (2,984)                              | 0.20 (92)                     | 0.21 (15)                         |
| New Brunswick        | 0.09 (2,154)                              | 0.10 (77)                     | 0.06 (15)                         |
| Ontario              | 0.36 (31,594)                             | 0.33 (785)                    | 0.28 (123)                        |
| Manitoba             | 0.19 (3,363)                              | 0.16 (89)                     | 0.10 (21)                         |
| Saskatchewan         | 0.22 (2,495)                              | 0.16 (103)                    | 0.15 (15)                         |
| Alberta              | 0.29 (6,680)                              | 0.20 (197)                    | 0.17 (26)                         |
| British Columbia     | 0.35 (11,500)                             | 0.28 (280)                    | 0.31 (48)                         |
| <b>Overall</b>       | <b>0.31 (63,504)</b>                      | <b>0.26 (1,633)</b>           | <b>0.23 (281)</b>                 |

<sup>1</sup> Proportion calculated for each patient and averaged over the n1 patients

<sup>2</sup> Proportion calculated for each surgeon and averaged over the n2 surgeons

<sup>3</sup> Proportion calculated for each institution and averaged over the n3 institutions
